# Supplementary material for: Helical dislocation-driven plasticity and flexible high-performance thermoelectric generator in α-Mg3Bi2 single crystals
Source: PubMed Central journal article supplement — Nat Commun. 2025 Jan 2;16:128. doi: 10.1038/s41467-024-55689-7 (PMC11695975; doi:10.1038/s41467-024-55689-7), 2025-01-02
Supplement: 41467_2024_55689_MOESM1_ESM.pdf [file 41467_2024_55689_MOESM1_ESM.pdf]

## Supplementary Information

### **Helical dislocation-driven plasticity and flexible high-performance thermoelectric generator in $\alpha$ -Mg<sub>3</sub>Bi<sub>2</sub> single crystals**

Mingyuan Hu<sup>1, 2†</sup>, Jianmin Yang<sup>1†</sup>, Yan Wang<sup>1†</sup>, Junchao Xia<sup>1,3</sup>, Quan Gan<sup>1</sup>, Shuhuan Yang<sup>1,3</sup>, Juping Xu<sup>4</sup>, Shulin Liu<sup>4</sup>, Wen Yin<sup>4</sup>, Baohai Jia<sup>1</sup>, Lin Xie<sup>1</sup>, Haifeng Li<sup>3</sup>, and Jiaqing He<sup>1,2\*</sup>

<sup>1</sup>Shenzhen Key Laboratory of Thermoelectric Materials, Department of Physics, Southern University of Science and Technology, Shenzhen, 518055, China.

<sup>2</sup>Guangdong Provincial Key Laboratory of Advanced Thermoelectric Materials and Device Physics, Southern University of Science and Technology, Shenzhen 518055, China.

<sup>3</sup>Institute of Applied Physics and Materials Engineering, University of Macau, Avenida da Universidade, Taipa, Macao SAR, 999078, China.

<sup>4</sup>Spallation Neutron Source Science Center, Dongguan 523803, China.

†These authors contributed equally to this work.

\*Correspondence to: [hejq@sustech.edu.cn](mailto:hejq@sustech.edu.cn) (**J.Q.H.**)

## Contents:

|                                                                                                                                                                             |    |
|-----------------------------------------------------------------------------------------------------------------------------------------------------------------------------|----|
| Supplementary Notes 1   Equations of carrier transport properties.....                                                                                                      | 5  |
| Supplementary Section 1   Phase and Mechanical performance for $\alpha$ -Mg <sub>3</sub> Bi <sub>2</sub> crystals...                                                        | 6  |
| Supplementary Figure 1   The as-grown p-type $\alpha$ -Mg <sub>3</sub> Bi <sub>2</sub> crystal.....                                                                         | 6  |
| Supplementary Figure 2   Single crystal' XRD and Laue diffraction patterns of $\alpha$ -Mg <sub>3</sub> Bi <sub>2</sub> .....                                               | 7  |
| Supplementary Figure 3   Powder XRD patterns for n-type and p-type $\alpha$ -Mg <sub>3</sub> Bi <sub>2</sub> crystals.....                                                  | 8  |
| Supplementary Figure 4   Deformed $\alpha$ -Mg <sub>3</sub> Bi <sub>2</sub> crystal slabs.....                                                                              | 9  |
| Supplementary Figure 5   Mechanical properties of $\alpha$ -Mg <sub>3</sub> Bi <sub>2</sub> .....                                                                           | 10 |
| Supplementary Figure 6   The nanoindentation tests.....                                                                                                                     | 11 |
| Supplementary Figure 7   Images of the samples before and after mechanical property testing.....                                                                            | 12 |
| Supplementary Figure 8   SEM images of the samples before and after deformation...                                                                                          | 13 |
| Supplementary Section 2: Atomic-scale locally distorted structures around helical dislocation.....                                                                          | 14 |
| Supplementary Figure 9   HAADF-STEM images of bent $\alpha$ -Mg <sub>3</sub> Bi <sub>2</sub> crystal.....                                                                   | 14 |
| Supplementary Figure 10   Atomic-scale observations of strain-induced locally distorted structures.....                                                                     | 15 |
| Supplementary Figure 11   Atom-column displacement maps for 13 lines of Mg and Bi atoms, generated using CalAtom software.....                                              | 16 |
| Supplementary Figure 12   Distortion of interlayer MgBi <sub>6</sub> and intralayer MgBi <sub>4</sub> polyhedra around helical dislocation as shown in Figs. 2e and 2g..... | 17 |
| Supplementary Figure 13   The structure model of helical dislocation based on the TEM results.....                                                                          | 18 |
| Supplementary Section 3   The crystal structure used for ab initio molecular dynamics (AIMD) simulations.....                                                               | 19 |
| Supplementary Figure 14   The crystal structure used for ab initio molecular dynamics (AIMD) simulations.....                                                               | 19 |

|                                                                                                                                                        |    |
|--------------------------------------------------------------------------------------------------------------------------------------------------------|----|
| Supplementary Section 4   Chemical bonding analysis $\alpha$ -Mg <sub>3</sub> Bi <sub>2</sub> by DFT calculation.                                      | 20 |
| Supplementary Figure 15   The schematic diagram of the (0001)[01 $\bar{1}$ 0] slip system.                                                             | 20 |
| Supplementary Figure 16   Plastic properties of $\alpha$ -Mg <sub>3</sub> Bi <sub>2</sub> .                                                            | 21 |
| Supplementary Figure 17   Plastic properties of $\alpha$ -Mg <sub>3</sub> Bi <sub>2</sub> along with other typical materials.                          | 22 |
| Supplementary Section 5   Thermoelectric performances of n-type and p-type $\alpha$ -Mg <sub>3</sub> Bi <sub>2</sub> crystals.                         | 23 |
| Supplementary Figure 18   Transport properties for n-type $\alpha$ -Mg <sub>3</sub> Bi <sub>2</sub> crystals.                                          | 23 |
| Supplementary Figure 19   Transport properties for p-type $\alpha$ -Mg <sub>3</sub> Bi <sub>2</sub> crystals.                                          | 24 |
| Supplementary Figure 20   Transport properties for p-type $\alpha$ -Mg <sub>3</sub> Bi <sub>2</sub> crystals.                                          | 25 |
| Supplementary Figure 21   Transport properties for p-type $\alpha$ -Mg <sub>3</sub> Bi <sub>2</sub> crystals.                                          | 26 |
| Supplementary Figure 22   Mechanical properties of n-type $\alpha$ -Mg <sub>3</sub> Bi <sub>2</sub> .                                                  | 27 |
| Supplementary Figure 23   Variations of electrical resistance with deformation cycles.                                                                 | 28 |
| Supplementary Figure 24   Repeat tests of the thermoelectric properties of the n-type $\alpha$ -Mg <sub>3</sub> Bi <sub>2</sub> .                      | 29 |
| Supplementary Section 6   Phase, thermoelectric and mechanical performances of p-type AgCu(Se, S, Te) pseudoternary solid solutions.                   | 30 |
| Supplementary Figure 25   The power XRD patterns of p-type AgCu(Se, S, Te) pseudoternary solid solutions in this job.                                  | 30 |
| Supplementary Figure 26   Thermoelectric and mechanical performances of p-type AgCu(Se, S, Te) pseudoternary solid solutions.                          | 31 |
| Supplementary Section 7   The Module fabrication of f-TEGs and output performances.                                                                    | 32 |
| Supplementary Figure 27   Fracture models under stress in different crystallographic directions for $\alpha$ -Mg <sub>3</sub> Bi <sub>2</sub> crystal. | 32 |
| Supplementary Figure 28   Schematic of the preparation of Cu/Fe/ $\alpha$ -Mg <sub>3</sub> Bi <sub>2</sub> /Fe/Cu layer structure.                     | 33 |
| Supplementary Figure 29   Output performances of n-type and p-type single-lag TEGs.                                                                    | 34 |

|                                                                                                                                                                                                          |    |
|----------------------------------------------------------------------------------------------------------------------------------------------------------------------------------------------------------|----|
| Supplementary Figure 30   Optical images of the as-prepared six-couple flexible TE devices with filling factors of 73.5%.....                                                                            | 35 |
| Supplementary Figure 31   Homemade apparatus for testing the output performance of f-TEG.....                                                                                                            | 36 |
| Supplementary Figure 32   Service stability of the f-TEG devices.....                                                                                                                                    | 37 |
| Supplementary Figure 33   Service stability of the f-TEG devices.....                                                                                                                                    | 38 |
| Supplementary Tables.....                                                                                                                                                                                | 39 |
| Supplementary Table 1   Plastic properties of $\alpha$ -Mg <sub>3</sub> Bi <sub>2</sub> along with other typical materials.....                                                                          | 39 |
| Supplementary Table 2   Thermoelectric performances of $\alpha$ -Mg <sub>3</sub> Bi <sub>2</sub> along with other typical materials.....                                                                 | 40 |
| Supplementary Table 3   Output performances of flexible thermoelectric devices.....                                                                                                                      | 41 |
| Supplementary Table 4   Room temperature mechanical properties of $\alpha$ -Mg <sub>3</sub> Bi <sub>2</sub> .....                                                                                        | 42 |
| Supplementary Table 5   Partial refined results from neutron diffraction data of small-sized $\alpha$ -Mg <sub>3</sub> Bi <sub>2</sub> single crystals before and after bending at room temperature..... | 43 |
| Supplementary Table 6   The values of integrated crystal orbital Hamilton population of different Mg-Bi bonds.....                                                                                       | 44 |
| Supplementary Table 7   Thermoelectric performances of n-type $\alpha$ -Mg <sub>3</sub> Bi <sub>2</sub> -based materials.....                                                                            | 45 |
| Supplementary Table 8   Output performance testing conditions of f-TEG.....                                                                                                                              | 46 |
| Supplementary References.....                                                                                                                                                                            | 47 |

## Supplementary Note 1

### Equations of carrier transport properties

The carrier transport properties of thermoelectric materials mainly include  $\sigma$  and  $S$ . According to Boltzmann transport theory, in the single parabolic band model, the  $\sigma$  can generally be obtained by the following formula<sup>76,77</sup>:

$$\sigma = ne\mu \quad (1)$$

where  $\mu$  is Hall mobility, which is  $\mu = \frac{e\tau}{m^*}$ , where  $\tau$  is carrier relaxation time and  $m^*$  is density of states effective mass.

The  $S$  of a metal and a degenerate semiconductor (heavily doped semiconductor, whose carrier concentration generally exceeds  $10^{19} \text{ cm}^{-3}$ ) can be expressed as:

$$S = \frac{8\pi^2 k_B^2 m^* T}{3eh^2} \left(\frac{\pi}{3n}\right)^{2/3} \quad (2)$$

where  $k_B$  is the Boltzmann constant,  $e$  is the charge of the electron,  $h$  is the Planck constant,  $n$  is the carrier concentration.

**Supplementary Section 1: Phase and Mechanical performance for  $\alpha$ -  
 $\text{Mg}_3\text{Bi}_2$  crystals.**

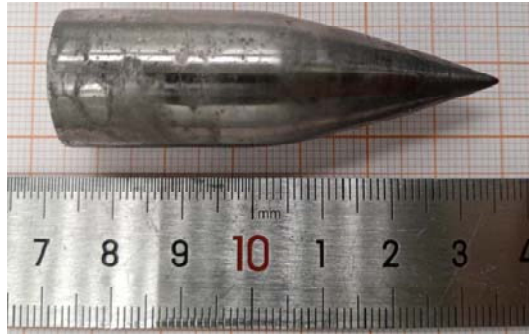

**Supplementary Figure 1.** The as-grown p-type  $\alpha$ - $\text{Mg}_3\text{Bi}_2$  crystal.

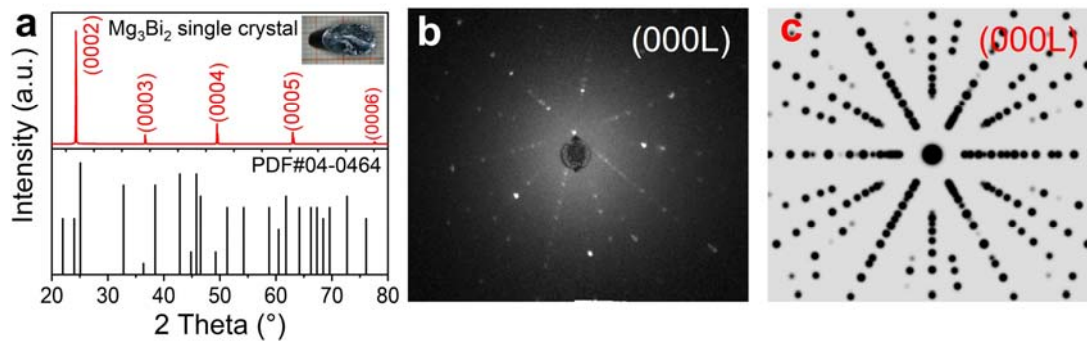

**Supplementary Figure 2. Single crystal' XRD and Laue diffraction patterns of  $\alpha$ - $\text{Mg}_3\text{Bi}_2$ .** **a**, XRD pattern for cleavage  $\alpha$ - $\text{Mg}_3\text{Bi}_2$  crystal, showing the (000L) facet. **b**, Obtained Laue diffraction pattern in experiment, which matched with the calculated Laue diffraction pattern (**c**).

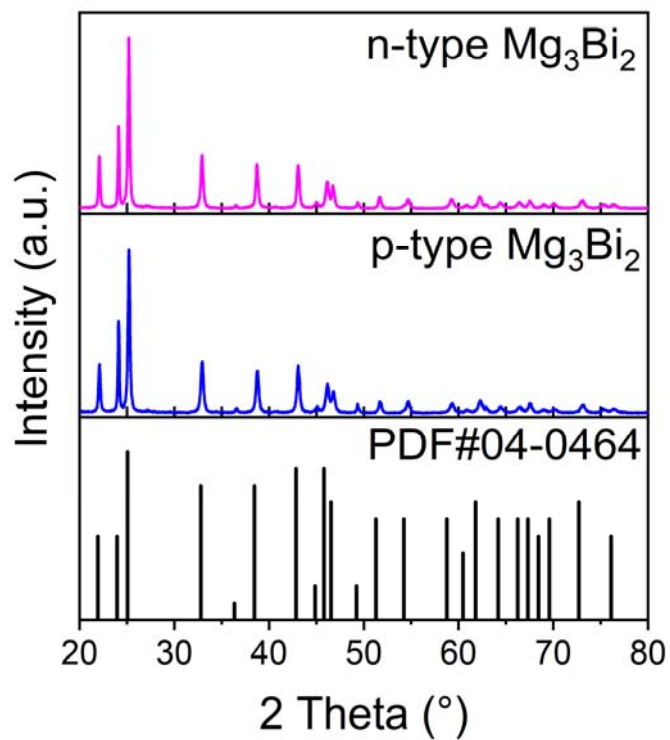

**Supplementary Figure 3.** Powder XRD patterns for n-type and p-type  $\alpha$ -Mg<sub>3</sub>Bi<sub>2</sub> crystals, which matched with the PDF#04-0464 card, meaning there were no second phase.



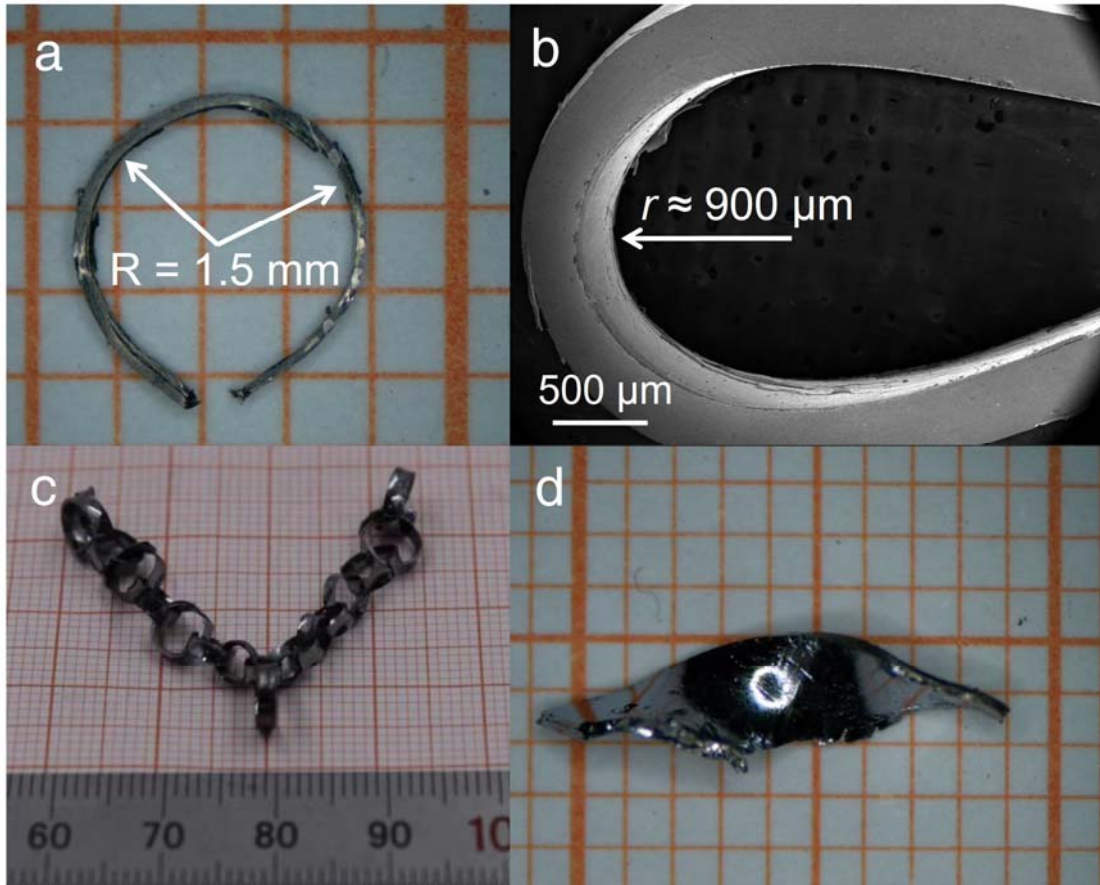

**Supplementary Figure 4. Deformed  $\alpha$ -Mg<sub>3</sub>Bi<sub>2</sub> crystal slabs.** **a**, The crystal slab with a thickness of 175  $\mu\text{m}$  showed a small bending radius of 1.5 mm. **b**, The SEM image of a bent crystal slab, and the thickness is about 273  $\mu\text{m}$ . **c**, A flexible chain deformed by crystal slabs. **d**, A twisted crystal slab.  $\alpha$ -Mg<sub>3</sub>Bi<sub>2</sub> crystal slabs can be morphed into various shapes without breaking.

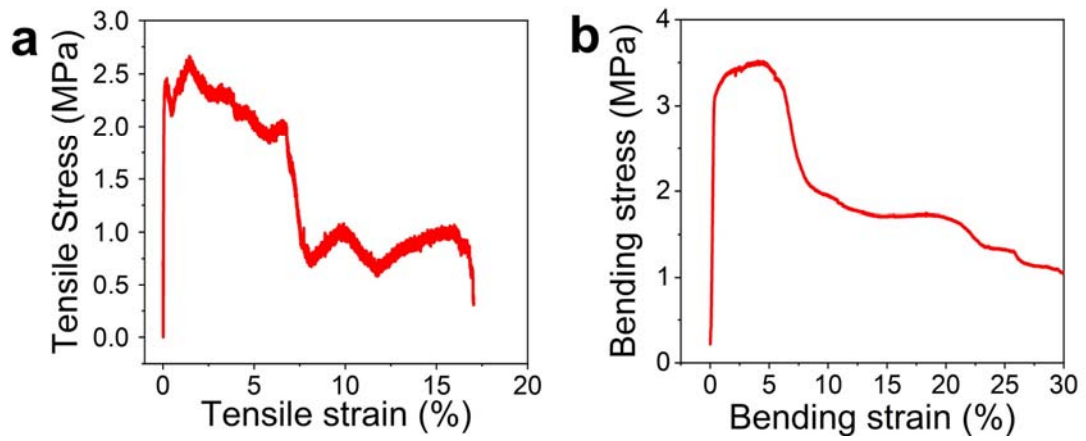

**Supplementary Figure 5. Mechanical properties of  $\alpha\text{-Mg}_3\text{Bi}_2$ .** The stress-strain curves of biaxial tensile test (a) and three-point bending test (b).

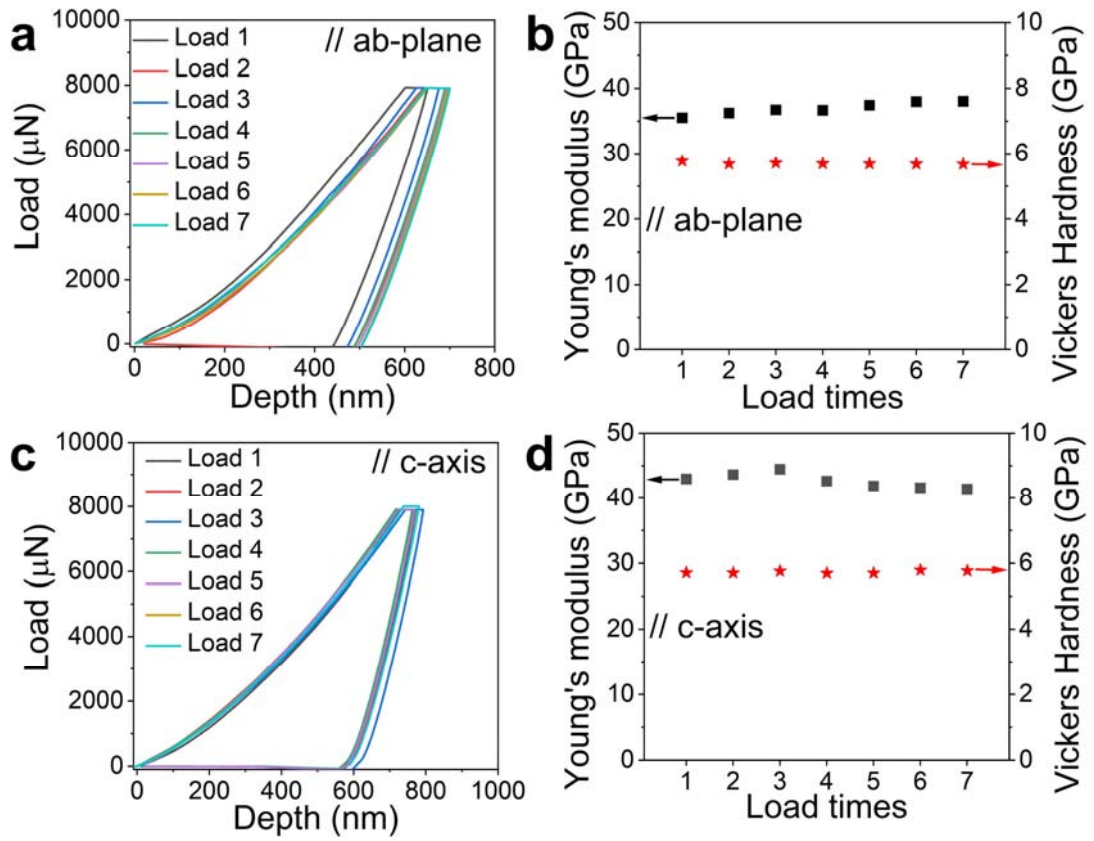

**Supplementary Figure 6. The nanoindentation tests.** **a**, The nanoindentation tests along ab-plane. **b**, Young's modulus, and Vickers Hardness along ab-plane. **c**, The nanoindentation tests along c-axis. **d**, Young's modulus, and Vickers Hardness along c-axis.

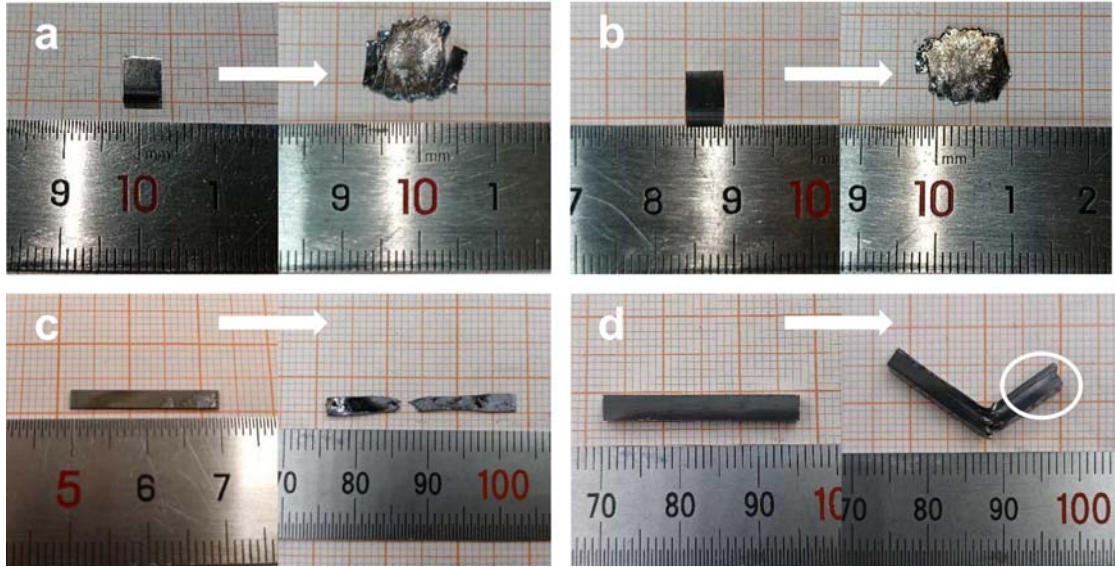

**Supplementary Figure 7. Images of the sample before and after mechanical property testing.** The samples for compression tests along the ab-plane (**a**) and c-axis (**b**). Samples for tensile (**c**) and three-point bending tests (**d**). These pictures show alterations in these samples before and after mechanical tests.

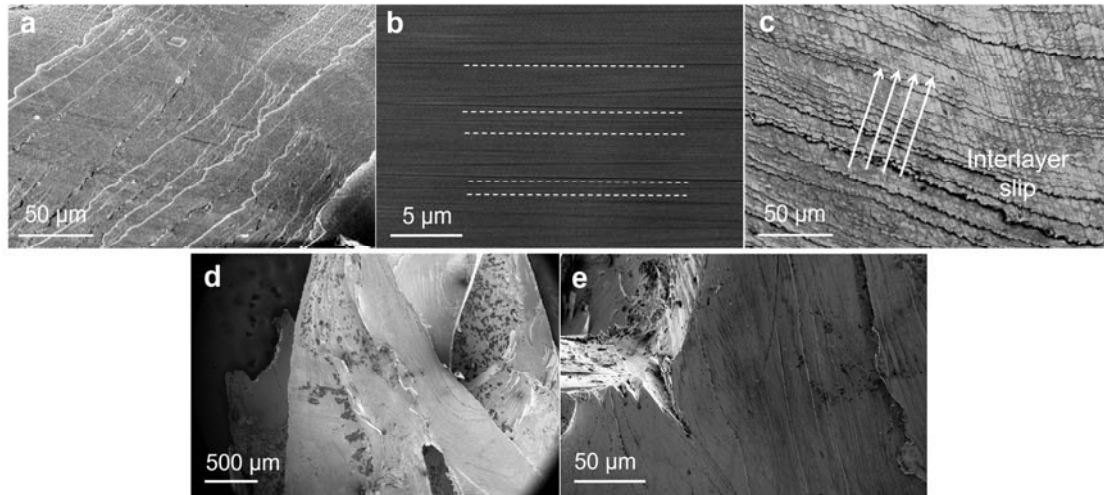

**Supplementary Figure 8. SEM images of the samples before and after deformation.**

**a**, The fresh cleavage surface of  $\alpha$ - $\text{Mg}_3\text{Bi}_2$ , showing obvious layer structures. **b**, The SEM image of the sample after the compression test. There are many slip bands. **c**, After the biaxial tensile test, the cleavage plane showed many interlayer slips. **(d, e)** SEM images of the fractured cross section morphologies after the tension test, in which numerous interlayer slips were observed. Beyond the tensile limit, the sample underwent plastic fracture.

## Supplementary Section 2: Atomic-scale locally distorted structures around helical dislocation.

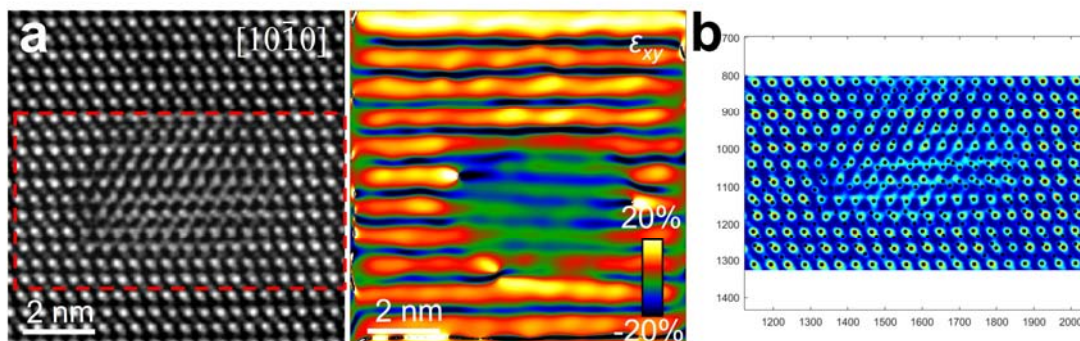

**Supplementary Figure 9. HAADF-STEM images of bent p-type  $\alpha$ -Mg<sub>3</sub>Bi<sub>2</sub>.** **a**, The atomic resolution iDPC image of another area in  $\alpha$ -Mg<sub>3</sub>Bi<sub>2</sub> along the  $[10\bar{1}0]$  orientation and the corresponding strain map. **b**, The average ellipse and its mass center of  $\alpha$ -Mg<sub>3</sub>Bi<sub>2</sub> (marked in the red box in Supplementary Figure 9a) generated using CalAtom software.

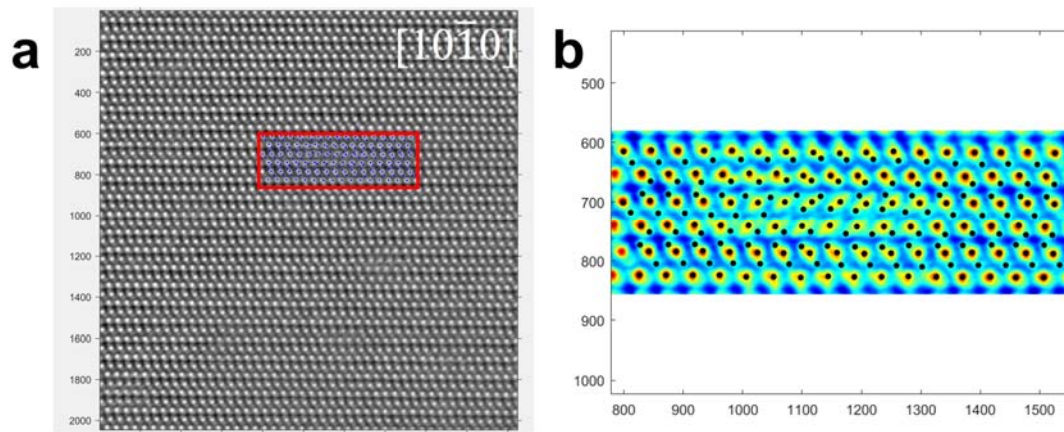

**Supplementary Figure 10. Atomic-scale observations of strain-induced locally distorted structures.** **a**, The atomic-resolution iDPC image of  $\alpha$ - $\text{Mg}_3\text{Bi}_2$  along the  $[10\bar{1}0]$  orientation with strain. **b**, The average ellipse and its mass center of  $\alpha$ - $\text{Mg}_3\text{Bi}_2$  determined using CalAtom software (marked by the red box in Supplementary Figure 10a, including 13 rows of atoms).

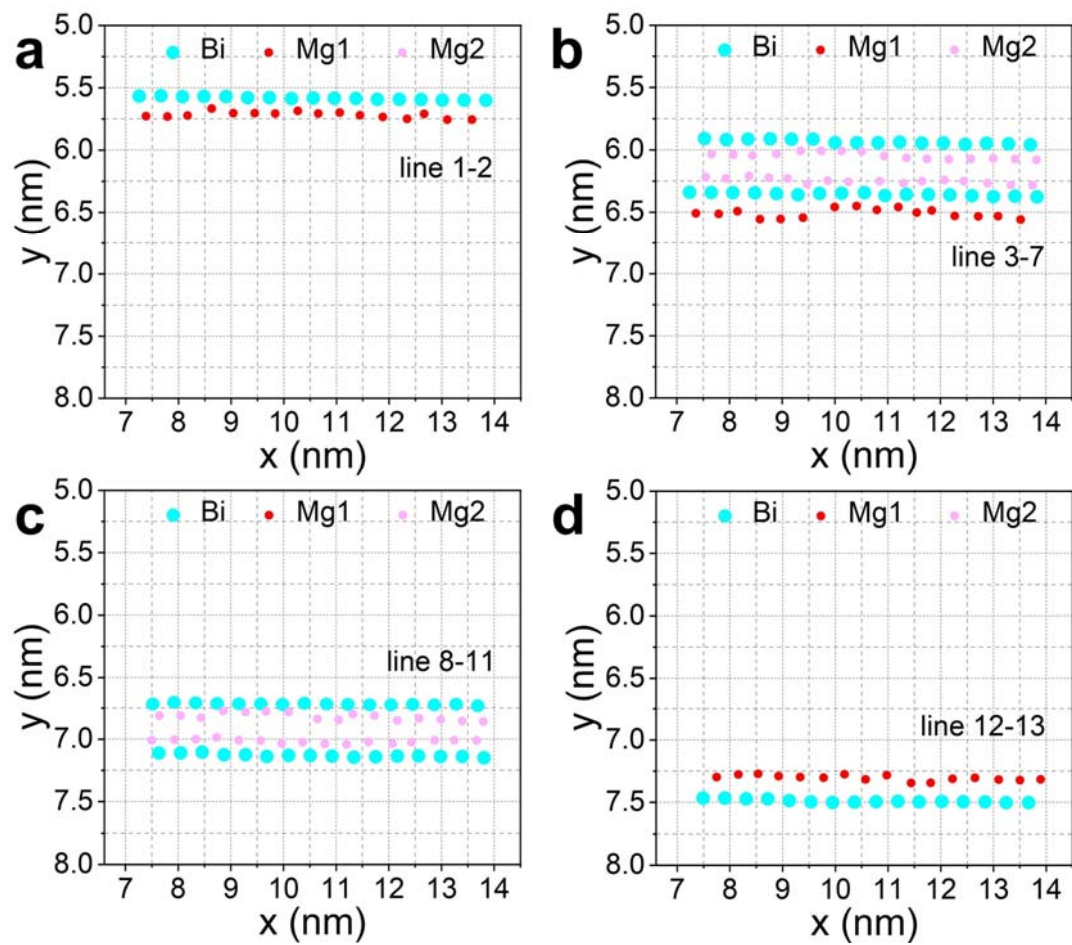

**Supplementary Figure 11.** Atom-column displacement maps for 13 lines of Mg and Bi atoms, generated using CalAtom software.



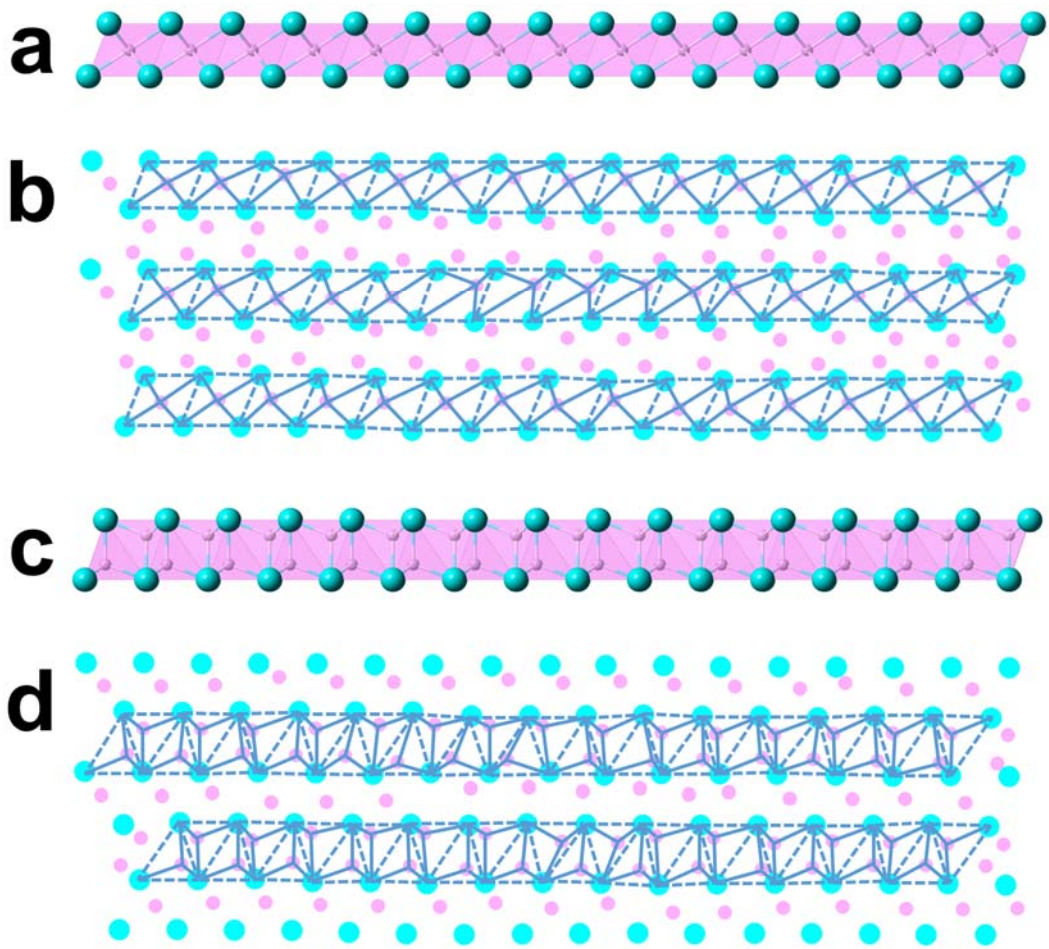

**Supplementary Figure 12. Distortion of interlayer MgBi<sub>6</sub> and intralayer MgBi<sub>4</sub> polyhedra around helical dislocation as shown in Figs. 2e and 2g. a, The initial interlayer MgBi<sub>6</sub> octahedra. b, The distorted interlayer MgBi<sub>6</sub> octahedron. c, The initial intralayer MgBi<sub>4</sub> tetrahedra. d, The distorted interlayer MgBi<sub>4</sub> octahedron.**

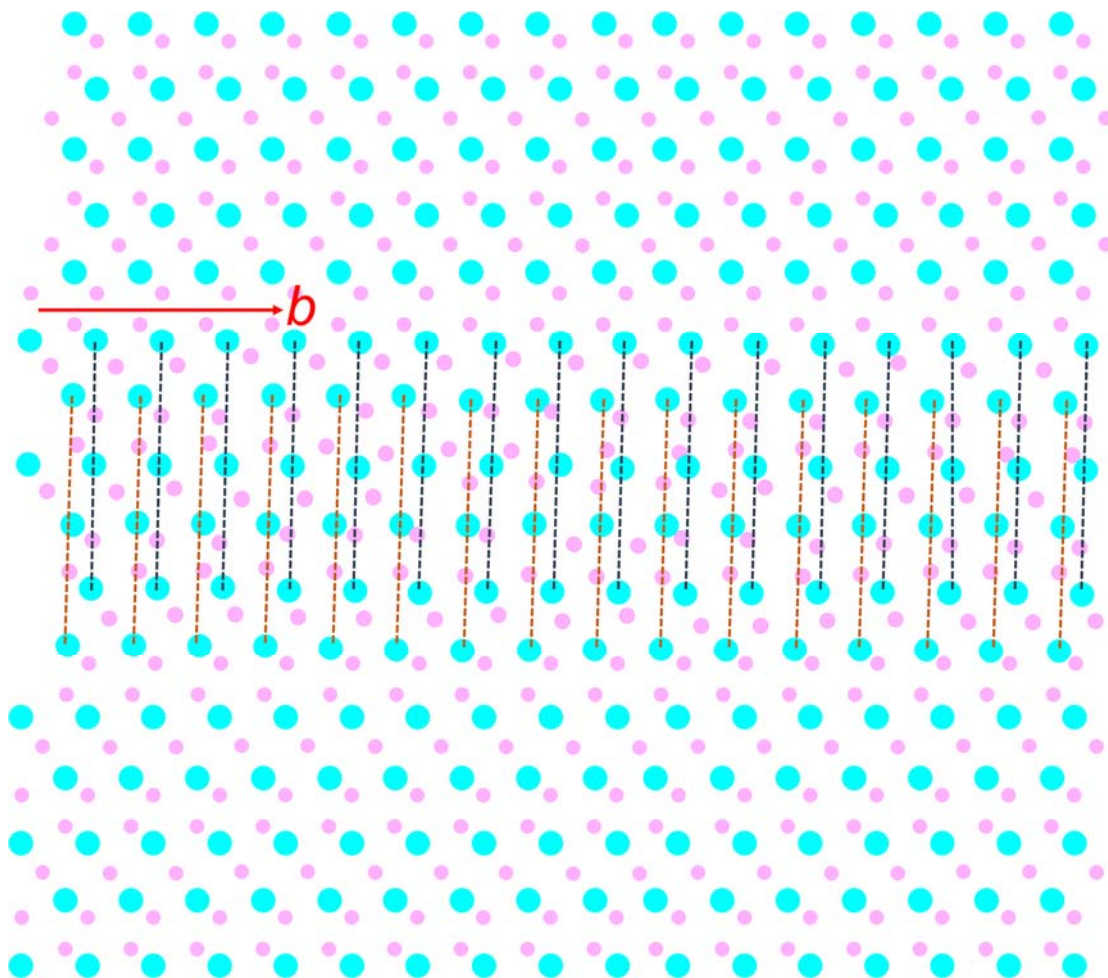

**Supplementary Figure 13.** The structure model of helical dislocation based on the TEM results. The solid red arrow represents the Burgers vector ( $b$ ).

**Supplementary Section 4: The crystal structure used for ab initio molecular dynamics (AIMD) simulations.**

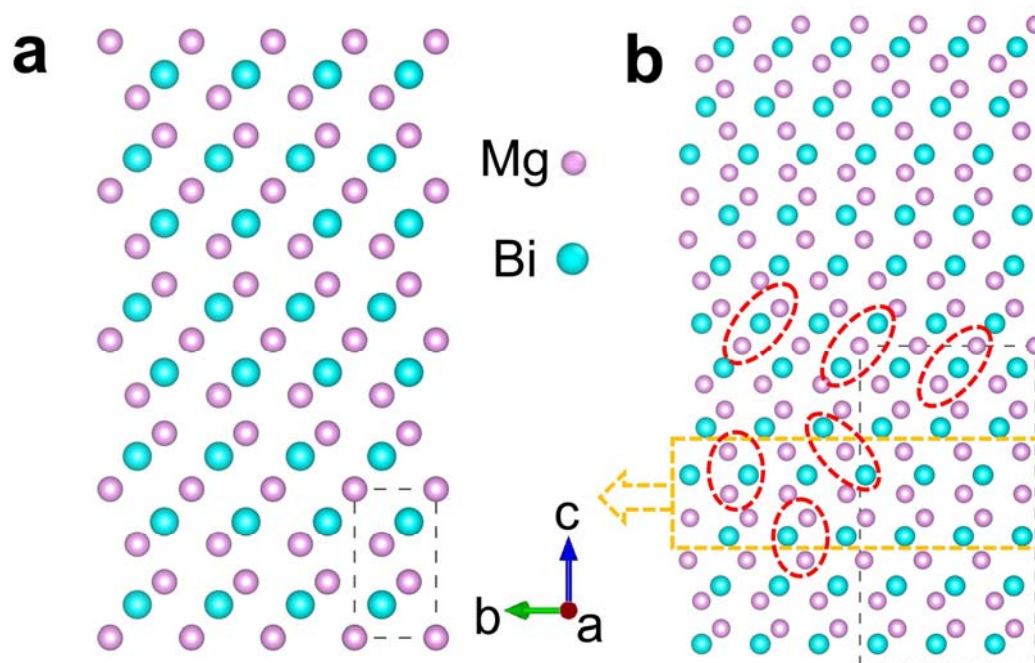

**Supplementary Figure 14. The crystal structure used for ab initio molecular dynamics (AIMD) simulations.** **a**, The structure of  $\alpha$ - $\text{Mg}_3\text{Bi}_2$  viewed along the  $[10\bar{1}0]$ . **b**, The optimized supercell of  $\alpha$ - $\text{Mg}_3\text{Bi}_2$  with layer slip by half a cycle (the slip direction is indicated by yellow arrow). The supercell of  $\alpha$ - $\text{Mg}_3\text{Bi}_2$ , containing 135 atoms, was optimized with layer slip distortion. As shown in Supplementary Fig. 14b, the optimized supercell with distortion forms a specific helical dislocation, which results in a unique reorientation or flipping of the atomic arrangement around the dislocation planes, highlighted in the red circle.

**Supplementary Section 5: Chemical bonding analysis  $\alpha$ -Mg<sub>3</sub>Bi<sub>2</sub> by DFT calculation**

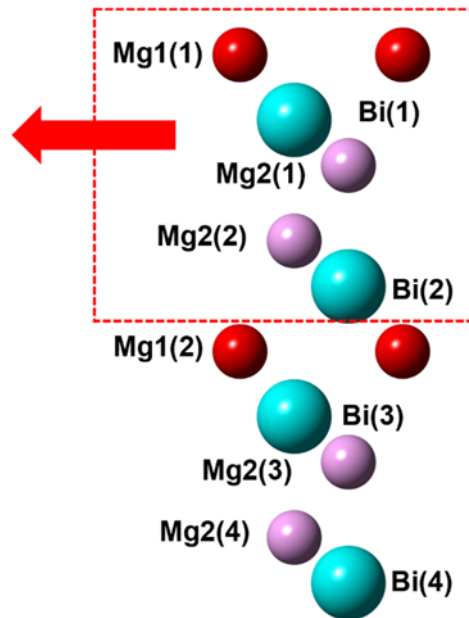

**Supplementary Figure 15.** The schematic diagram of the (0001)[01 $\bar{1}$ 0] slip system.

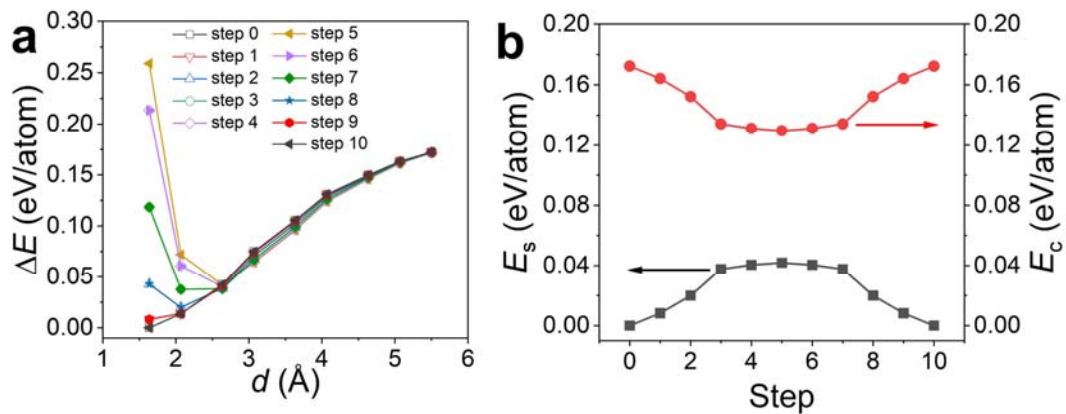

**Supplementary Figure 16. Plastic properties of  $\alpha$ -Mg<sub>3</sub>Bi<sub>2</sub>.** **a**, Energy variation as a function of the interlayer distance ( $d$ ) for each step through slipping. **b**, The step-by-step variations of slipping energy  $E_s$  and cleavage energy  $E_c$  through slipping.

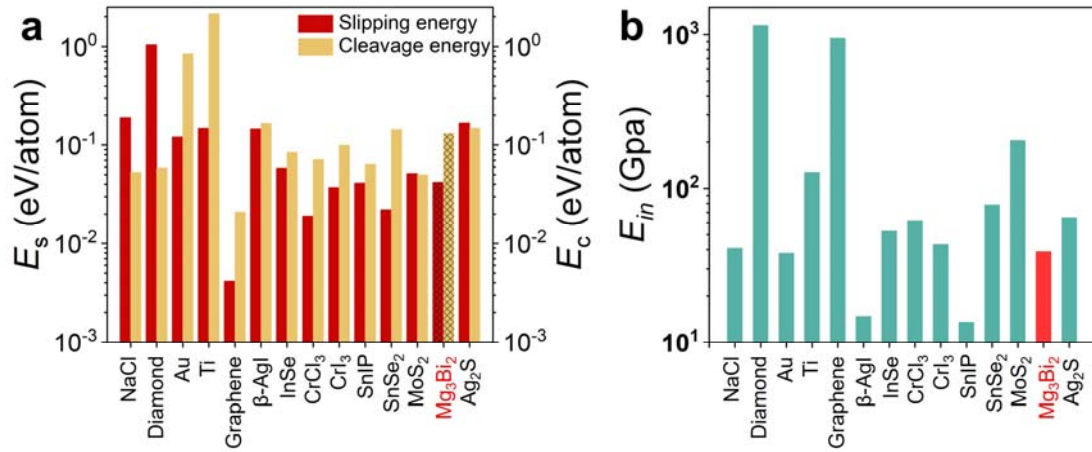

**Supplementary Figure 17. Plastic properties of  $\alpha$ -Mg<sub>3</sub>Bi<sub>2</sub> along with other typical materials. a**, calculated slipping energy ( $E_s$ ), cleavage energy ( $E_c$ ); **b**, intralayer Young's modulus  $E_{in}$  of  $\alpha$ -Mg<sub>3</sub>Bi<sub>2</sub> and several other materials, and details are listed in Supplementary Table 1<sup>30,32,34,35</sup>.

**Supplementary Section 5: Thermoelectric performances of n-type and p-type  $\alpha$ -Mg<sub>3</sub>Bi<sub>2</sub> crystals**

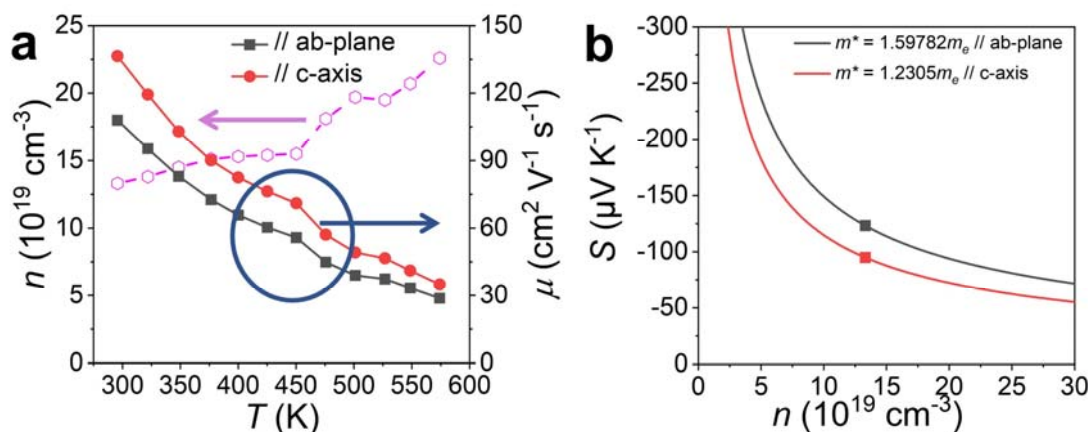

**Supplementary Figure 18. Transport properties for n-type  $\alpha$ -Mg<sub>3</sub>Bi<sub>2</sub> crystals. a,** Temperature-dependent carrier concentration ( $n$ ) and Hall mobility ( $\mu$ ) of n-type  $\alpha$ -Mg<sub>3</sub>Bi<sub>2</sub> crystal. **b,** Experimental data versus calculated plots of Seebeck coefficient. The solid line connecting the scatter was predicted from a single parabolic band model, and  $m^*$  is the density of states effective mass.

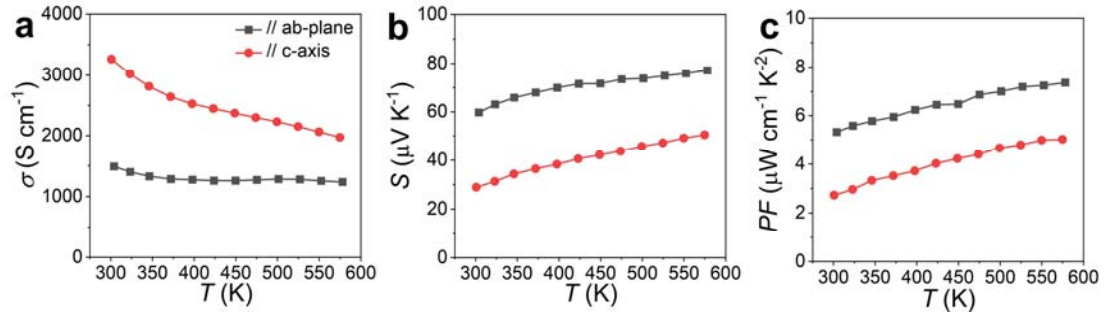

**Supplementary Figure 19. Transport properties for p-type  $\alpha$ - $\text{Mg}_3\text{Bi}_2$  crystals.**

Temperature-dependent electrical conductivity (a), Seebeck coefficient (b), and power factor (c) of p-type  $\alpha$ - $\text{Mg}_3\text{Bi}_2$  crystal.



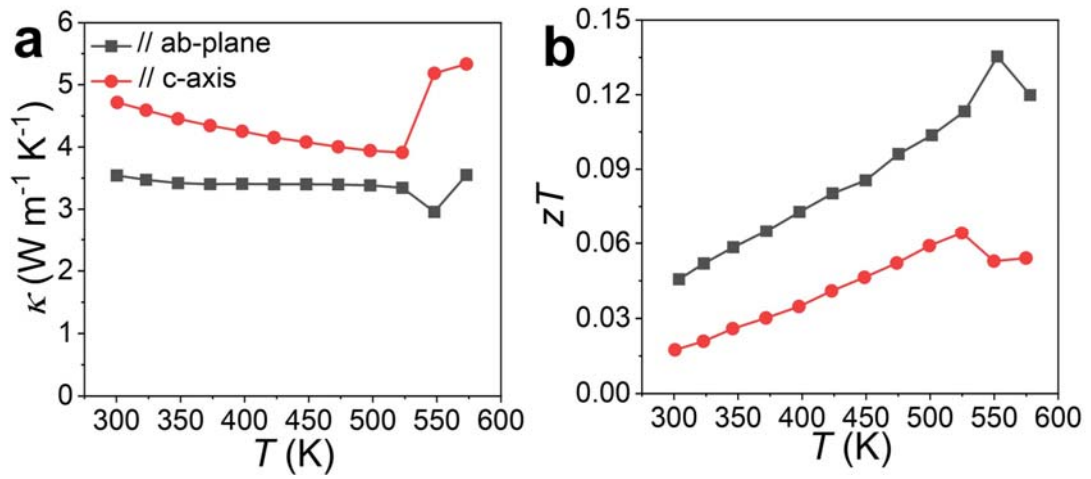

**Supplementary Figure 20. Transport properties for p-type  $\alpha$ -Mg<sub>3</sub>Bi<sub>2</sub> crystals.**

Temperature-dependent thermal conductivity (a) and  $zT$  value (b) of p-type  $\alpha$ -Mg<sub>3</sub>Bi<sub>2</sub> crystal.

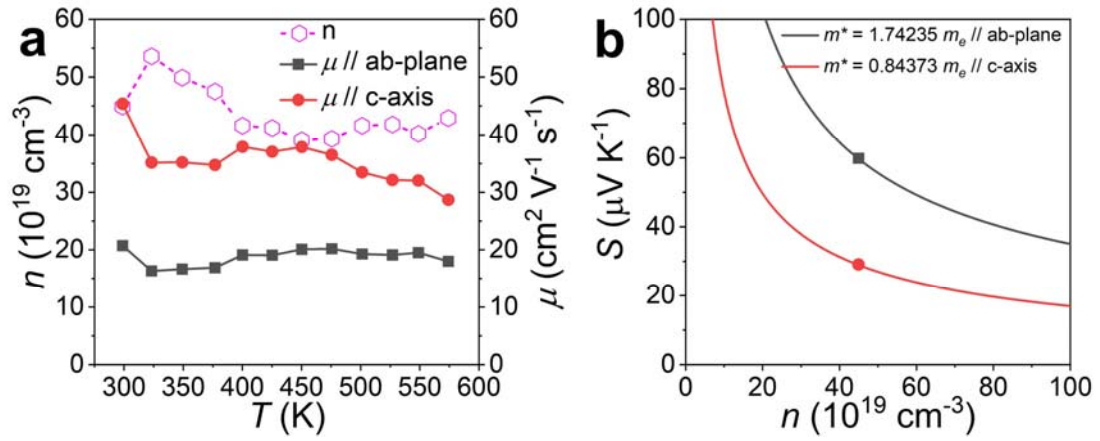

**Supplementary Figure 21. Transport properties for p-type  $\alpha$ -Mg<sub>3</sub>Bi<sub>2</sub> crystals. a,** Temperature-dependent carrier concentration ( $n$ ) and Hall mobility ( $\mu$ ) of p-type  $\alpha$ -Mg<sub>3</sub>Bi<sub>2</sub> crystal. **b,** Experimental data versus calculated plots of Seebeck coefficient. The solid line connecting the scatter was predicted from a single parabolic band model.

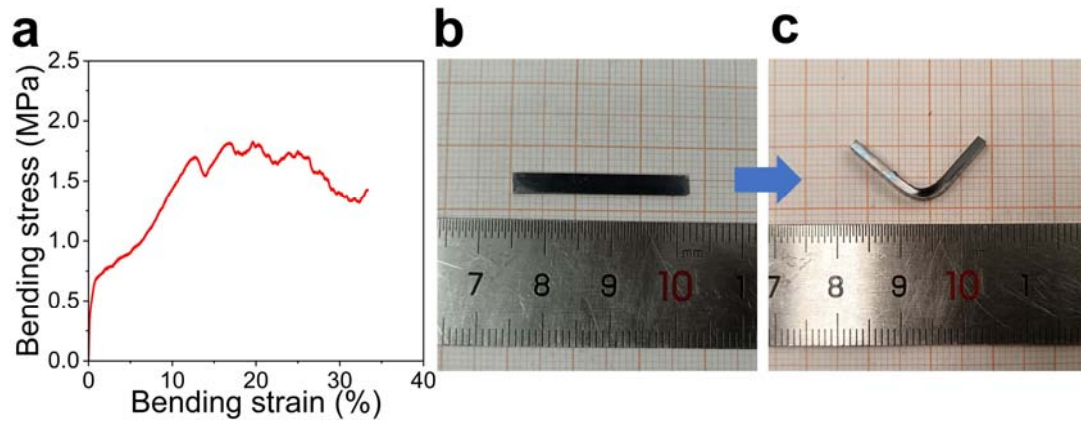

**Supplementary Figure 22. Mechanical properties of n-type Te-doped  $\alpha$ -Mg<sub>3</sub>Bi<sub>2</sub>.** **a**, The stress-strain curve of three-point bending test. **b**, Single-crystal specimens used for three-point bending tests ( $3.07 \times 1.52 \times 6.46$  mm<sup>3</sup>). **c**, The bent sample of n-type  $\alpha$ -Mg<sub>3</sub>Bi<sub>2</sub> crystal. The n-type  $\alpha$ -Mg<sub>3</sub>Bi<sub>2</sub> crystals also exhibited >30% bending strain.

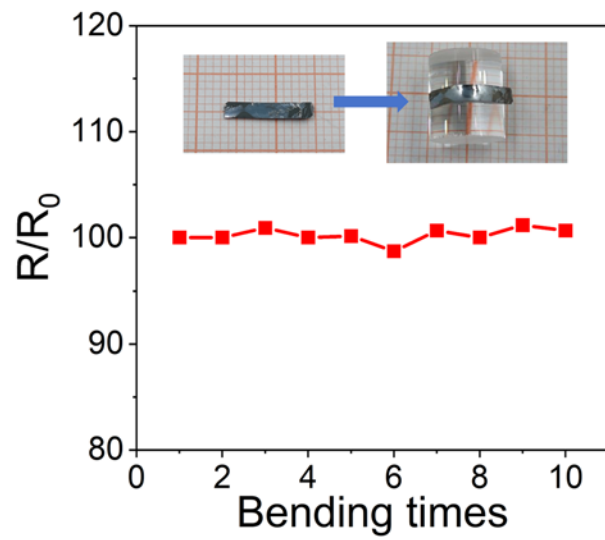

**Supplementary Figure 23.** Variations of electrical resistance with deformation cycles. The thickness of the  $\alpha$ -Mg<sub>3</sub>Bi<sub>2</sub> crystal slab is about 477  $\mu\text{m}$ , and the bending radius is 4.5 mm.

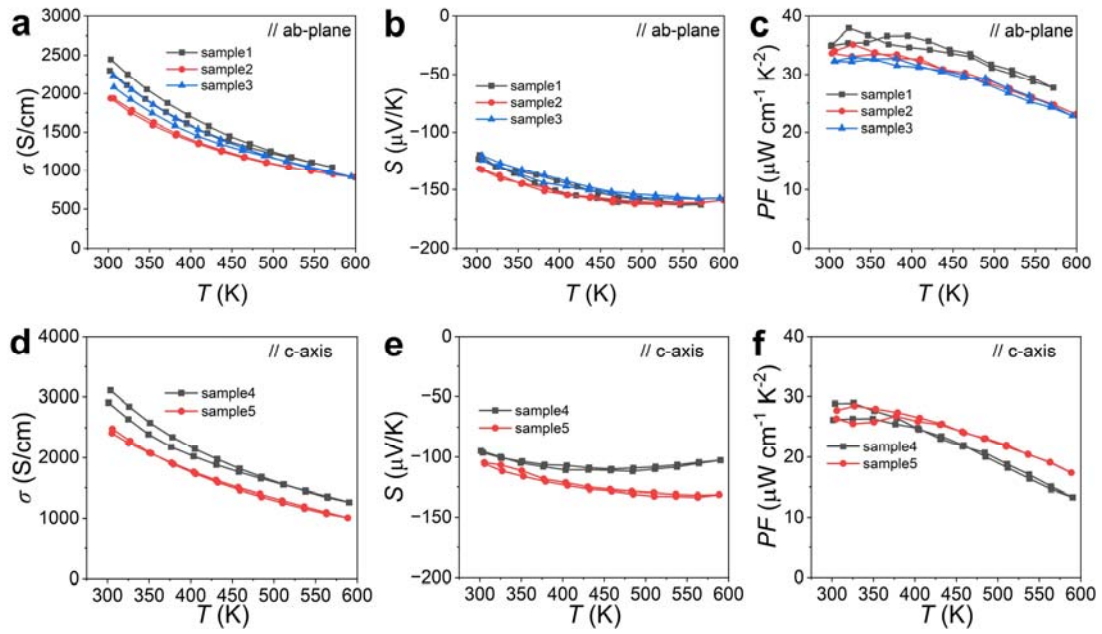

**Supplementary Figure 24. Repeat tests of the thermoelectric properties of the n-type  $\alpha$ - $\text{Mg}_3\text{Bi}_2$ .** Temperature-dependent electrical resistivity (a, d), Seebeck coefficient (b, e), and power factor (c, f). The transport properties are highly comparable among these samples, indicating the good reproducibility of the thermoelectric properties.

**Supplementary Section 6: Phase, thermoelectric and mechanical performances of p-type AgCu(Se, S, Te) pseudoternary solid solutions**

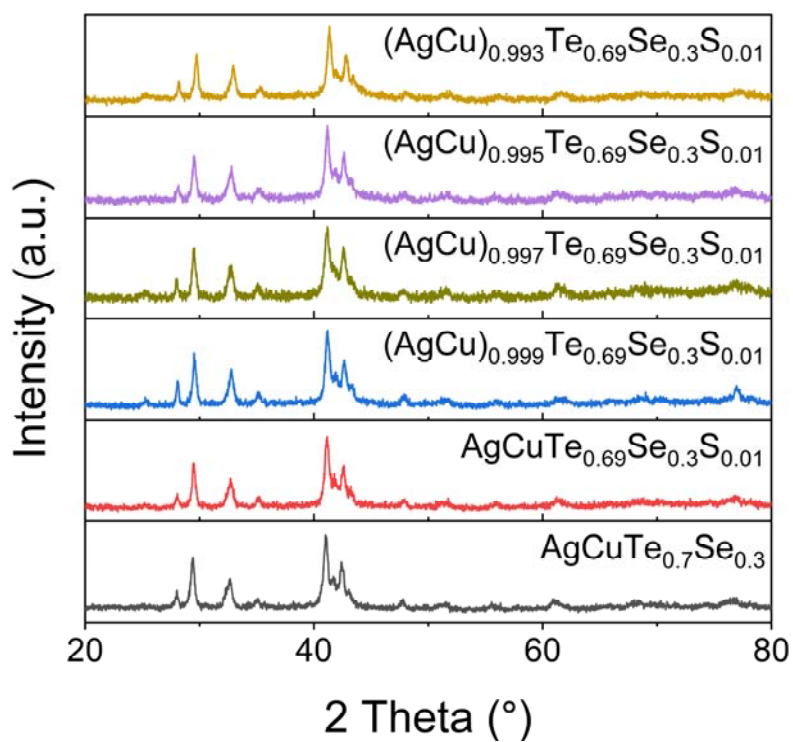

**Supplementary Figure 25.** The power XRD patterns of p-type AgCu(Se, S, Te) pseudoternary solid solutions in this job, which matched with that for Yang' work<sup>6</sup>.

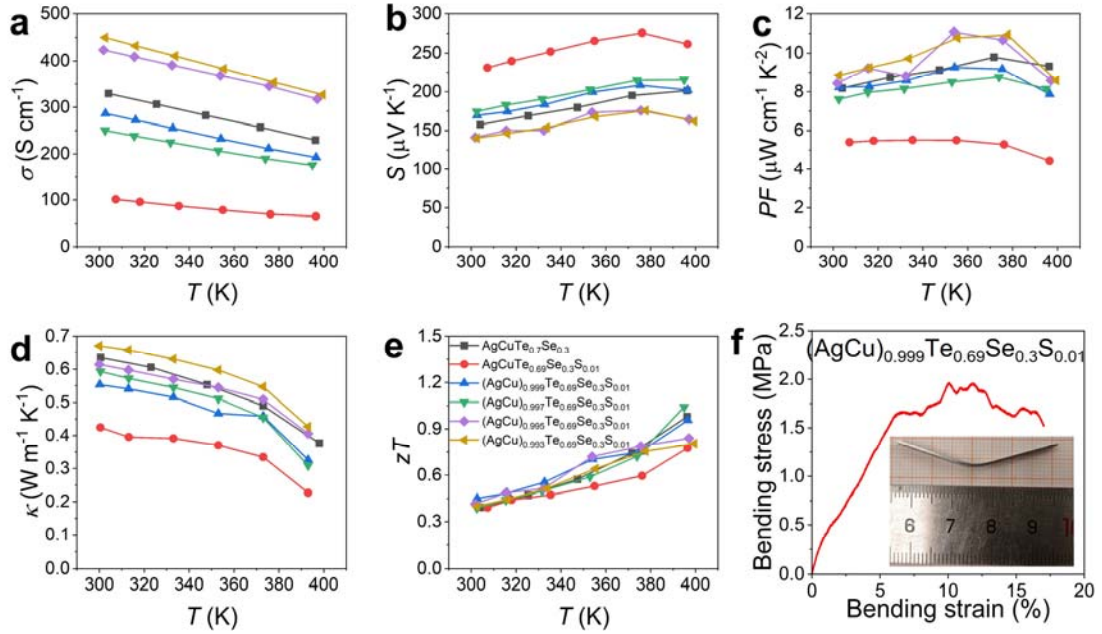

**Supplementary Figure 26. Thermoelectric and mechanical performances of p-type AgCu(Se, S, Te) pseudoternary solid solutions. (a-e)** Temperature-dependent electric and thermal transport properties of p-type AgCuTe<sub>0.7</sub>Se<sub>0.3</sub>-based ingots. In the (AgCu)<sub>0.999</sub>Te<sub>0.69</sub>Se<sub>0.3</sub>S<sub>0.01</sub> ingot, we obtained best thermoelectric performance with room-temperature  $zT$  value of 0.45, max  $zT$  value of 0.96 at 393 K, and the average  $zT$  value was 0.66 between 300-400 K. **f**, The stress-strain curves of three-point bending test for (AgCu)<sub>0.999</sub>Te<sub>0.69</sub>Se<sub>0.3</sub>S<sub>0.01</sub> slab (4.43\*0.58\*40.15 mm<sup>3</sup>), which exhibited a bending strain greater than 17%.

## Supplementary Section 7: The Module fabrication of f-TEGs and output performances

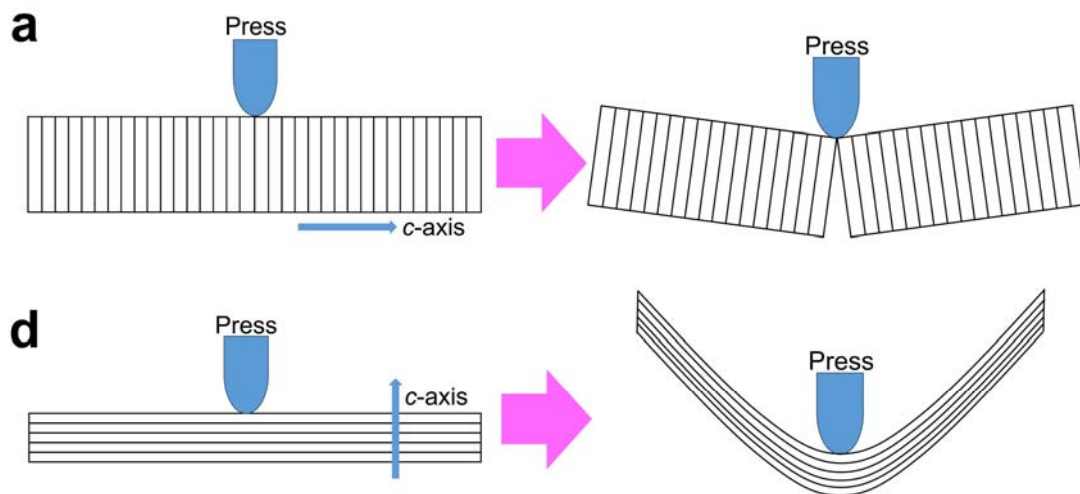

**Supplementary Figure 27.** Fracture models under stress in different crystallographic directions (**a.** Press along ab-plane; **b.** press in c-axis) for  $\alpha$ - $\text{Mg}_3\text{Bi}_2$  crystal. The interlayer Mg1-Bi chemical bonds are relatively weak, and  $\alpha$ - $\text{Mg}_3\text{Bi}_2$  easily dissociates along the ab-plane. When subjected to stress along the ab-plane, the samples are prone to dissociation, leading to an open circuit in the device. Although the thermoelectric performance along the c-axis is not optimal, it is suitable for the out-of-plane devices.



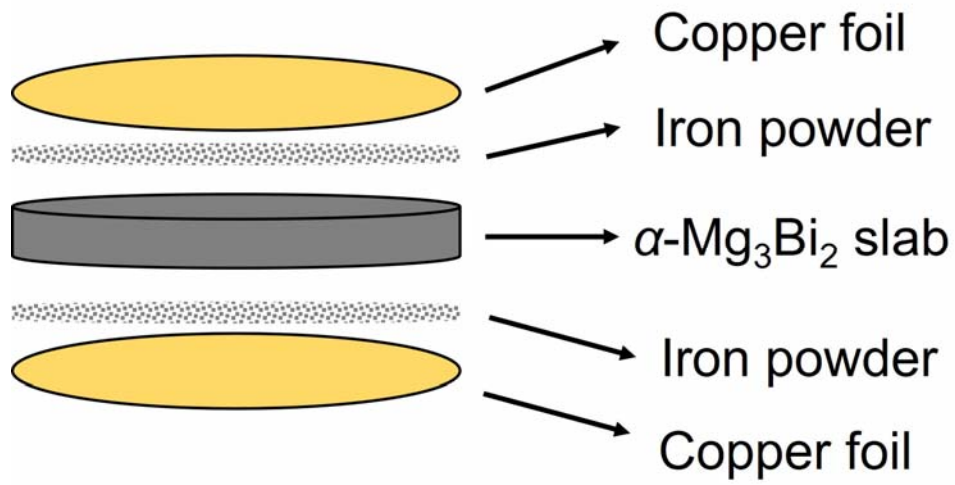

**Supplementary Figure 28.** Schematic of the preparation of Cu/Fe/ $\alpha$ -Mg<sub>3</sub>Bi<sub>2</sub>/Fe/Cu layer structure.

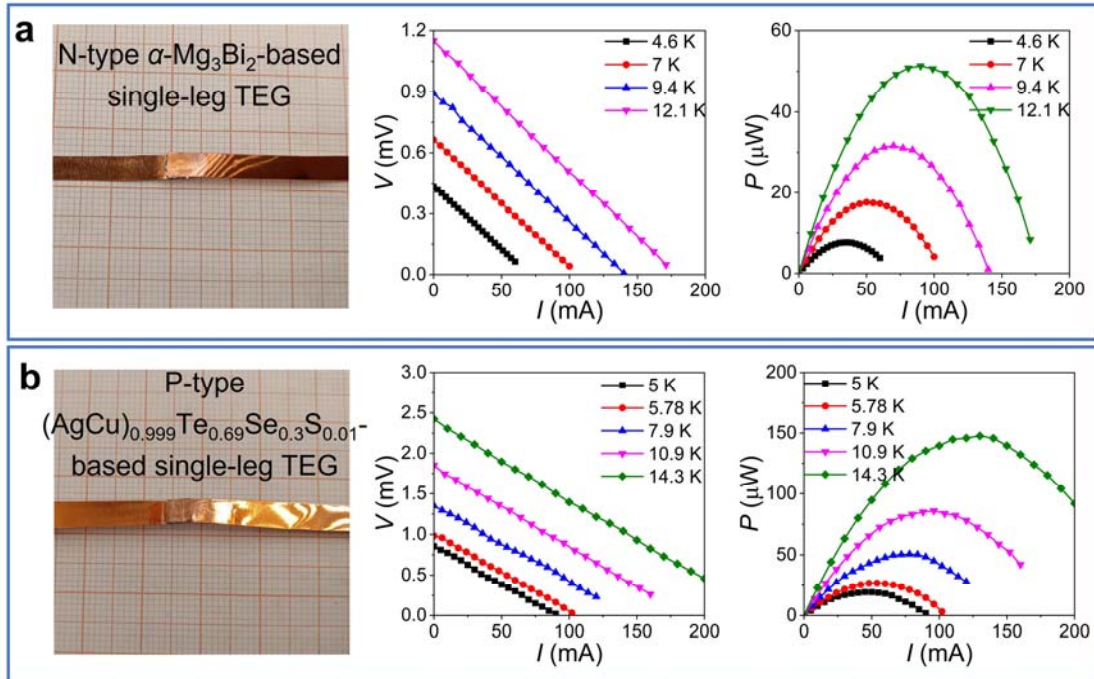

**Supplementary Figure 29. Output performances of n-type and p-type single-leg TEGs.** **a**, The n-type  $\alpha$ - $\text{Mg}_3\text{Bi}_2$ -based single-leg TEG, and its output performance. **b**, p-type  $(\text{AgCu})_{0.999}\text{Te}_{0.69}\text{Se}_{0.3}\text{S}_{0.01}$ -based single-leg TEG, and its output performance.

The as-prepared n-type  $\alpha$ - $\text{Mg}_3\text{Bi}_2$  crystal and p-type  $(\text{AgCu})_{0.999}\text{Te}_{0.69}\text{Se}_{0.3}\text{S}_{0.01}$  ingots were cut into thin plates with the thickness about 330  $\mu\text{m}$  by using the diamond wire cutting. The metallic barrier layers were both prepared for n-type and p-type materials by using spark plasma sintering (SPS- 211LX) at 773 K under a pressure of 50 MPa for 5 min, as shown in Supplementary Fig. 28. Then the plates were cut into square thermoelectric legs of  $4 \times 4 \text{ mm}^2$  by using the diamond wire cutting. The single-leg TEGs were fabricated by placing n-type and p-type legs between copper foils, as shown in Supplementary Figs. 29a and 29b. For n-type single-leg TEG, the measured open circuit voltage ( $V_{\text{oc}}$ ) and maximum output power ( $P_{\text{max}}$ ) were 1.151 mV and 51.4  $\mu\text{W}$ , respectively, under a temperature gradient ( $\Delta T$ ) of 12.1 K. For p-type single-leg TEG, the measured open circuit voltage ( $V_{\text{oc}}$ ) and maximum output power ( $P_{\text{max}}$ ) were 2.43 mV and 147.7  $\mu\text{W}$ , respectively, under a temperature gradient ( $\Delta T$ ) of 14.3 K. In a word, the output performance of the six-couple out-of-plane f-TEG, as shown in Fig. 5, benefits from the combined contributions of the n-type and p-type legs.

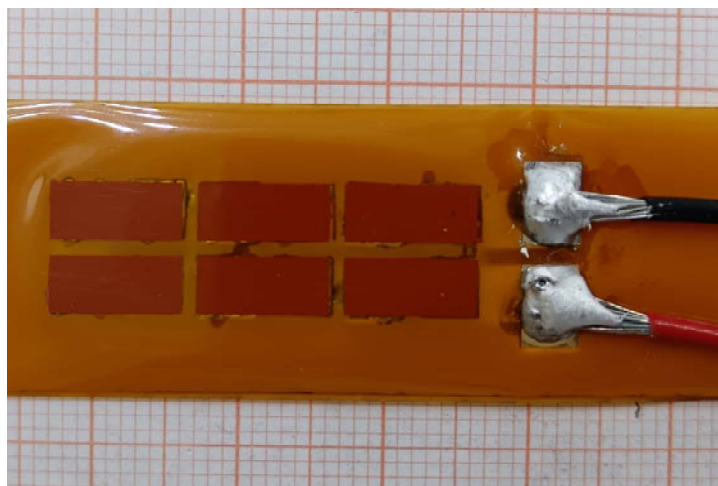

**Supplementary Figure 30.** Optical images of the as-prepared six-couple flexible TE devices with filling factors of 73.5%. And the thickness of this flexible TE was only 0.88 mm.

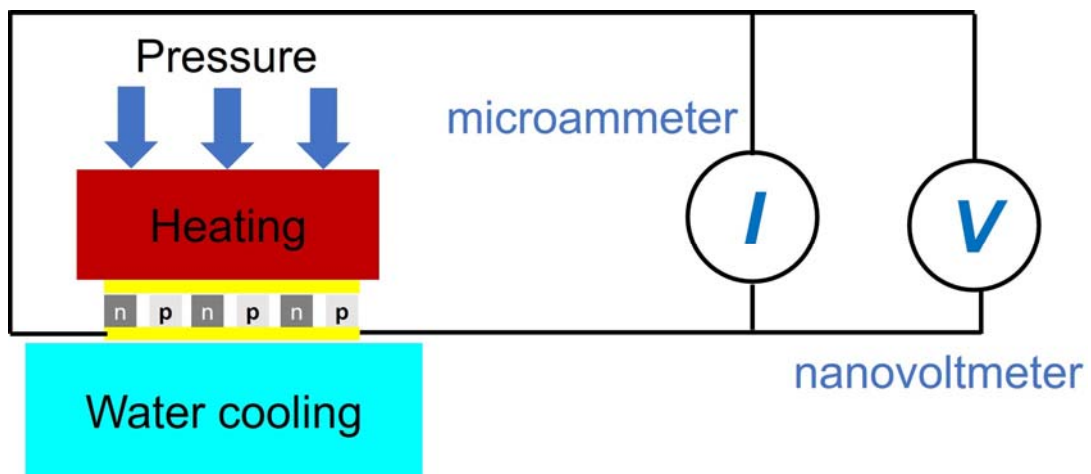

**Supplementary Figure 31.** Homemade apparatus for testing the output performance of f-TEG.

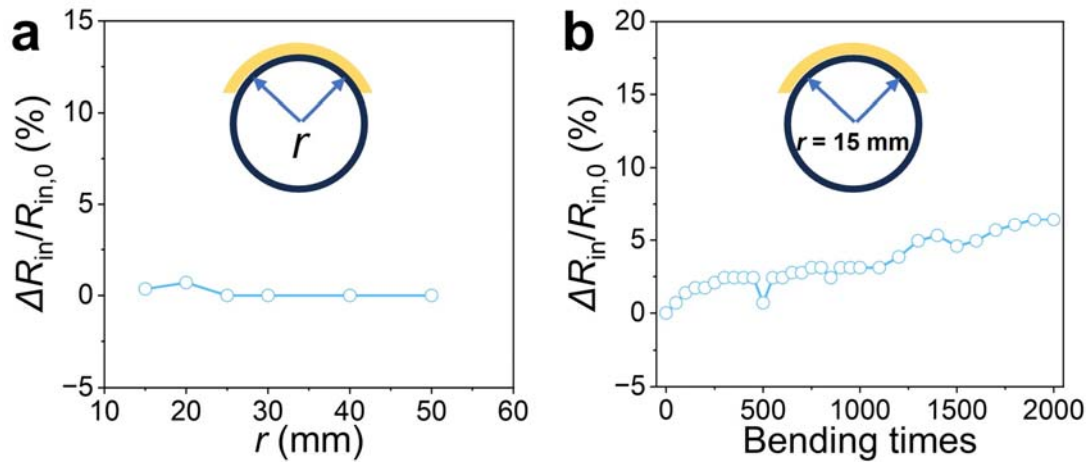

**Supplementary Figure 32. Service stability of the f-TEG devices. a,**  $\Delta R_{in}/R_{in,0}$  of the 6-couple flexible devices with different bending radius. **b,**  $\Delta R_{in}/R_{in,0}$  of the 6-couple flexible devices in the bending test with the bending radius of 15 mm.

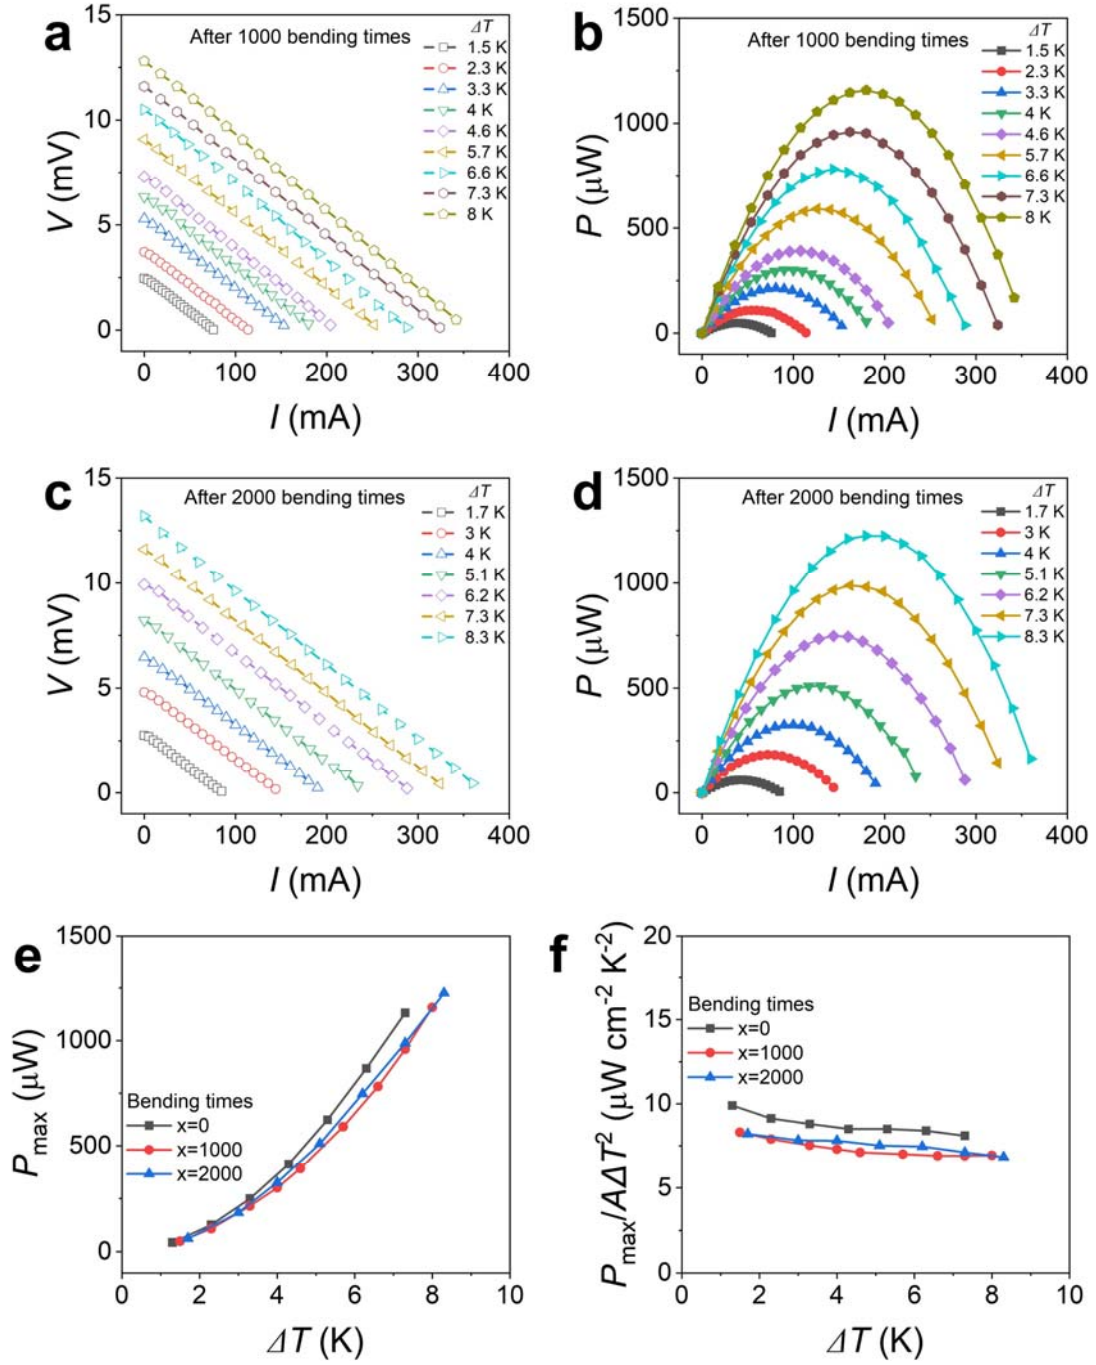

**Supplementary Figure 33. Service stability of the f-TEG devices.** (a, b) The output performance of the device after 1000 bending times. Current ( $I$ ) dependencies of the output voltage ( $V$ ) and output power ( $P$ ). (c, d) The output performance of the device after 2000 bending times. e, Bending time-dependent maximum output power ( $P_{\text{max}}$ ). f, Bending time-dependent maximum normalized power density ( $P_{\text{max}}/A\Delta T^2$ ).

**Supplementary Table 1.**

**Plastic properties of  $\alpha$ -Mg<sub>3</sub>Bi<sub>2</sub> along with other typical materials.** Band gap, space group, calculated slipping energy  $E_s$ , cleavage energy  $E_c$ , in-plane modulus  $E_{in}$  along the slipping direction, and the deformability factor  $\Xi$  of selected materials<sup>30,32,34,35</sup>.

| <b>Materials</b>                          | <b>Bandgap<br/>(eV)</b> | <b>Space<br/>group</b> | <b><math>E_s</math><br/>(eV/atom)</b> | <b><math>E_c</math><br/>(eV/atom)</b> | <b><math>E_{in}</math><br/>(Gpa)</b> | <b>Slip &amp;<br/>cleavage<br/>system</b> | <b><math>\Xi</math> factor<br/>(Gpa<sup>-1</sup>)</b> | <b>Ref.</b>      |
|-------------------------------------------|-------------------------|------------------------|---------------------------------------|---------------------------------------|--------------------------------------|-------------------------------------------|-------------------------------------------------------|------------------|
| NaCl                                      | 8.7                     | Fm $\bar{3}$ m         | 0.188                                 | 0.0527                                | 41                                   | (001) [100]                               | 0.0068                                                | 30               |
| Diamond                                   | 5.6                     | Fd $\bar{3}$ m         | 1.041                                 | 0.0585                                | 1149                                 | (111) [1-10]                              | 0.000049                                              | 30               |
| Au                                        | 0                       | Fm $\bar{3}$ m         | 0.12                                  | 0.85                                  | 38                                   | (110) [1-10]                              | 0.19                                                  | 30               |
| Ti                                        | 0                       | P6 <sub>3</sub> /mmc   | 0.147                                 | 2.149                                 | 128                                  | (001) [100]                               | 0.11                                                  | 30               |
| Graphene                                  | 0                       | P6 <sub>3</sub> /mmc   | 0.00413                               | 0.0209                                | 951                                  | (001) [100]                               | 0.0053                                                | 30               |
| $\beta$ -AgI                              | 3                       | P6 <sub>3</sub> mc     | 0.145                                 | 0.165                                 | 14.8                                 | (001) [100]                               | 0.077                                                 | 30               |
| InSe                                      | 1.2                     | P6 <sub>3</sub> /mmc   | 0.058                                 | 0.0844                                | 53                                   | (001) [100]                               | 0.027                                                 | 30               |
| CrCl <sub>3</sub>                         | 1.53                    | C2/m                   | 0.019                                 | 0.0716                                | 62.1                                 | (001) [010]                               | 0.06104                                               | 32               |
| CrI <sub>3</sub>                          | 1.58                    | C2/m                   | 0.037                                 | 0.0997                                | 43.4                                 | (001) [010]                               | 0.0633                                                | 32               |
| SnIP                                      | 1.8                     | P12/c1                 | 0.041                                 | 0.064                                 | 13.6                                 | [100]                                     | 0.1148                                                | 34               |
| SnSe <sub>2</sub>                         | 1                       | P $\bar{3}$ m1         | 0.022                                 | 0.143                                 | 78.77                                | (001)[120]                                | 0.0821                                                | 35               |
| MoS <sub>2</sub>                          | 1.491                   | P6 <sub>3</sub> /mmc   | 0.0511                                | 0.0499                                | 206                                  | (001) [100]                               | 0.0047                                                | 30               |
| $\alpha$ -Mg <sub>3</sub> Bi <sub>2</sub> | 0                       | P $\bar{3}$ m1         | 0.04184                               | 0.13051                               | 39                                   | (0001) [0100]                             | 0.08                                                  | <b>This work</b> |
| Ag <sub>2</sub> S                         | 1.01                    | P21/c                  | 0.166                                 | 0.148                                 | 65                                   | (100) [001]                               | 0.014                                                 | 30               |

**Supplementary Table 2.**

**Thermoelectric performances of  $\alpha$ -Mg<sub>3</sub>Bi<sub>2</sub> along with other typical materials.** The electrical conductivity ( $\sigma$ ), Seebeck coefficient ( $S$ ), and power factor ( $PF$ ) of some inorganic plastic thermoelectric semiconductors<sup>6,20-29,31,39</sup>.

| Materials                                                                      |             | $\sigma$<br>(S cm <sup>-1</sup> ) | $S$<br>( $\mu$ V K <sup>-1</sup> ) | PF<br>( $\mu$ W cm <sup>-1</sup> K <sup>-2</sup> ) | Ref.      |
|--------------------------------------------------------------------------------|-------------|-----------------------------------|------------------------------------|----------------------------------------------------|-----------|
| $\alpha$ -Mg <sub>3</sub> Bi <sub>2</sub>                                      | // ab-plane | 2230                              | -123.3                             | 35                                                 | This work |
|                                                                                | // c-axis   | 2907.4                            | -95                                | 26.2                                               |           |
| (AgCu) <sub>0.998</sub> Se <sub>0.22</sub> S <sub>0.08</sub> Te <sub>0.7</sub> |             | 83.4                              | 246.6                              | 5.1                                                | 6         |
| Ag <sub>2</sub> Se <sub>0.69</sub> S <sub>0.31</sub>                           |             | 1324                              | -120                               | 22                                                 | 20        |
| Ag <sub>3.96</sub> SSe                                                         |             | 345.4                             | -121.5                             | 5.26                                               | 21        |
| Ag <sub>2</sub> S <sub>0.5</sub> Se <sub>0.45</sub> Te <sub>0.05</sub>         |             | 270                               | -136                               | 4.496                                              | 22        |
| Ag <sub>2</sub> S <sub>0.8</sub> Te <sub>0.2</sub>                             |             | 390                               | -101                               | 3.98                                               | 22        |
| Ag <sub>2</sub> S <sub>0.5</sub> Se <sub>0.5</sub>                             |             | 300                               | -123                               | 4.84                                               | 22        |
| Ag <sub>2</sub> Se <sub>0.6</sub> S <sub>0.4</sub>                             |             | 600                               | -100                               | 6                                                  | 23        |
| Ag <sub>2</sub> Te <sub>0.7</sub> S <sub>0.3</sub>                             |             | 1050                              | -65                                | 4.44                                               | 24        |
| Ag <sub>3.95</sub> TeS                                                         |             | 130                               | -195                               | 5.16                                               | 25        |
| Ag <sub>20</sub> S <sub>7.1</sub> Te <sub>2.9</sub>                            |             | 275.3                             | -128                               | 4.5                                                | 26        |
| Ag <sub>2</sub> S <sub>0.6</sub> Te <sub>0.4</sub> fiber                       |             | 420                               | -115                               | 6.63                                               | 27        |
| Ag <sub>2</sub> S <sub>0.45</sub> Se <sub>0.45</sub> Te <sub>0.1</sub>         |             | 659.6                             | -91                                | 5.8                                                | 28        |
| Ag <sub>2</sub> S <sub>1/3</sub> Se <sub>1/3</sub> Te <sub>1/3</sub>           |             | 600                               | -100                               | 6                                                  | 29        |
| Cu <sub>0.005</sub> SnSe <sub>1.95</sub> Cl <sub>0.05</sub> (375K)             |             | 268                               | -259.4                             | 18                                                 | 31        |
| Cu <sub>0.005</sub> SnSe <sub>1.95</sub> Br <sub>0.05</sub> (375 K)            |             | 390                               | -218.6                             | 18.5                                               |           |
| Mg <sub>3.2</sub> Bi <sub>1.998</sub> Te <sub>0.002</sub>                      |             | 1429                              | -200                               | 55                                                 | 39        |
| // ab-plane                                                                    |             |                                   |                                    |                                                    |           |
| Mg <sub>3.2</sub> Bi <sub>1.998</sub> Te <sub>0.002</sub>                      |             | 2356                              | -57                                | 7.65                                               |           |
| // c-plane                                                                     |             |                                   |                                    |                                                    |           |



**Supplementary Table 3.**

Output performances of flexible thermoelectric devices.

| Flexible devices                                                                                          | $\Delta T$ (K) | $P_{\max}/A\Delta T^2$ | Ref. |
|-----------------------------------------------------------------------------------------------------------|----------------|------------------------|------|
|                                                                                                           | 10             | 5.7                    |      |
| n-Mg <sub>3.2</sub> Bi <sub>1.498</sub> Sb <sub>0.5</sub> Te <sub>0.002</sub> +                           | 20             | 5.5                    |      |
| p-Bi <sub>0.4</sub> Sb <sub>1.6</sub> Te <sub>3</sub>                                                     | 30             | 5.5                    | 41   |
|                                                                                                           | 40             | 5.4                    |      |
|                                                                                                           | 50             | 5.5                    |      |
| n-Mg <sub>3.2</sub> Bi <sub>1.498</sub> Sb <sub>0.5</sub> Te <sub>0.002</sub> +                           | 7.2            | 2.04E-5                |      |
| Cu wire                                                                                                   | 13.1           | 2.08E-5                | 40   |
| p-(AgCu) <sub>0.998</sub> Se <sub>0.22</sub> S <sub>0.08</sub> Te <sub>0.7</sub> +                        | 2.2            | 30                     | 6    |
| n-Ag <sub>20</sub> S <sub>3</sub> Te <sub>7</sub>                                                         |                |                        |      |
| Ag <sub>2</sub> Se network-based device                                                                   | 16             | 15.6E-3                | 42   |
| Bi <sub>2</sub> Te <sub>3</sub> + Sb <sub>2</sub> Te <sub>3</sub> on Si                                   | 20             | 0.3475                 | 43   |
| Bi <sub>2</sub> Te <sub>3</sub> + Sb <sub>2</sub> Te <sub>3</sub> on glass fabric                         | 47.5           | 1.58                   | 44   |
| Screen-printed                                                                                            |                |                        |      |
| Bi <sub>0.5</sub> Sb <sub>1.5</sub> Te <sub>3</sub> + Bi <sub>2</sub> Te <sub>2.7</sub> Se <sub>0.3</sub> | 25             | 7.6                    | 45   |
| Bi <sub>2</sub> Te <sub>3</sub> -based                                                                    | 50             | 6.68E-4                | 46   |
| Bi <sub>2</sub> Te <sub>3</sub> -based                                                                    | 150            | 8.22                   | 47   |
| PEDOT-based                                                                                               | 10             | 2.33E-4                | 9    |
| poly(metal 1,1,2,2-ethenetetrathiolate)-based                                                             | 30             | 1.31E-3                | 48   |
| Carbon nanotube yarn-based                                                                                | 48             | 2.32E-3                | 49   |
| PEDOT:PSS (p) +                                                                                           |                |                        |      |
| fullerene derivative (n)                                                                                  | 25             | 4.86E-5                | 50   |

**Supplementary Table 4.**

Room temperature mechanical properties of  $\alpha$ -Mg<sub>3</sub>Bi<sub>2</sub>.

| <b>Compression</b>    |                            | <b>Tension</b>   |                            |                               | <b>Bending</b>   |                            |                               | <b>Vickers<br/>Hardness</b> | <b>Young's<br/>modulus</b> |
|-----------------------|----------------------------|------------------|----------------------------|-------------------------------|------------------|----------------------------|-------------------------------|-----------------------------|----------------------------|
| Modulus<br>(GPa)      | Yield<br>strength<br>(MPa) | Modulus<br>(GPa) | Yield<br>strength<br>(MPa) | Fracture<br>strength<br>(MPa) | Modulus<br>(GPa) | Yield<br>strength<br>(MPa) | Fracture<br>strength<br>(MPa) | (GPa)                       | (GPa)                      |
| 0.51                  | 17.43                      |                  |                            |                               |                  |                            |                               | 5.7                         | 36.95                      |
| (// <i>ab</i> -plane) | (// <i>ab</i> -plane)      | 5.405            | 2.462                      | 2                             | 1.044            | 3.38                       | -                             | (// <i>ab</i> -plane)       | (// <i>ab</i> -plane)      |
| 5.69                  | 116.44                     |                  |                            |                               |                  |                            |                               | 5.72                        | 42.79                      |
| (// <i>c</i> -axis)   | (// <i>c</i> -axis)        |                  |                            |                               |                  |                            |                               | (// <i>ab</i> -plane)       | (// <i>c</i> -axis)        |

**Supplementary Table 5.**

Partial refined results from neutron diffraction data of small-sized  $\alpha$ -Mg<sub>3</sub>Bi<sub>2</sub> single crystals before and after bending at room temperature.

| <b>Partial refined results of Mg<sub>3</sub>Bi<sub>2</sub> single crystals before bending</b> |           |               |          |            |                 |
|-----------------------------------------------------------------------------------------------|-----------|---------------|----------|------------|-----------------|
| Peak Index                                                                                    | Peak type | Area Integral | FWHM (Å) | Max Height | Center Peak (Å) |
| Mg2-Bi                                                                                        | Gaussian  | 0.09078       | 0.14063  | 0.60645    | 2.81752         |
| Mg2-Bi                                                                                        | Gaussian  | 0.38102       | 0.18803  | 1.90366    | 2.91462         |
| Mg1-Bi                                                                                        | Gaussian  | 0.43247       | 0.24994  | 1.62549    | 3.0348          |
| Mg2-Mg2                                                                                       | Gaussian  | 0.41614       | 0.39024  | 1.00184    | 3.23349         |
| Mg1-Mg2                                                                                       | Gaussian  | 0.16379       | 0.3851   | 0.39957    | 3.71541         |
| Bi-Bi                                                                                         | Gaussian  | 0.27019       | 0.42879  | 0.59223    | 4.5412          |
| Mg1-Mg1                                                                                       | Gaussian  | 0.87816       | 0.33706  | 2.45185    | 4.72673         |

  

| <b>Partial refined results of Mg<sub>3</sub>Bi<sub>2</sub> single crystals after bending</b> |           |               |          |            |                 |
|----------------------------------------------------------------------------------------------|-----------|---------------|----------|------------|-----------------|
| Peak Index                                                                                   | Peak type | Area Integral | FWHM (Å) | Max Height | Center Peak (Å) |
| Mg2-Bi                                                                                       | Gaussian  | 0.8122        | 0.17459  | 0.43843    | 2.77755         |
| Mg2-Bi                                                                                       | Gaussian  | 0.58836       | 0.2338   | 2.3653     | 2.90201         |
| Mg1-Bi                                                                                       | Gaussian  | 0.62382       | 0.29129  | 2.01193    | 3.06633         |
| Mg2-Mg2                                                                                      | Gaussian  | 0.22421       | 0.28499  | 0.73907    | 3.30314         |
| Mg1-Mg2                                                                                      | Gaussian  | 0.51032       | 0.82473  | 0.58183    | 3.66774         |
| Bi-Bi                                                                                        | Gaussian  | 0.44629       | 0.50414  | 0.83213    | 4.45084         |
| Mg1-Mg1                                                                                      | Gaussian  | 1.00426       | 0.36757  | 2.57516    | 4.72062         |

**Supplementary Table 6.**

The values of integrated crystal orbital Hamilton population of different Mg-Bi bonds, as shown in Figs. 3d-3f, for steps 0-5 during slip along the  $[01\bar{1}0]$  direction.

| <b>Bonds</b> | <b>-ICOHP (eV)</b> |               |              |
|--------------|--------------------|---------------|--------------|
|              | <b>Step 0</b>      | <b>Step 2</b> | <b>Step5</b> |
| Mg1(2)-Bi(2) | 0.1944             | 0.334         | 0.399        |
| Mg1(2)-Bi(3) | 0.245              | 0.224         | 0.205        |
| Mg2(2)-Bi(1) | 0.408              | 0.385         | 0.373        |
| Mg2(2)-Bi(2) | 0.333              | 0.383         | 0.339        |
| Mg2(4)-Bi(3) | 0.231              | 0.259         | 0.283        |
| Mg2(3)-Bi(3) | 0.252              | 0.249         | 0.234        |

### Supplementary Table 7.

**Thermoelectric performances of n-type  $\alpha$ -Mg<sub>3</sub>Bi<sub>2</sub>-based materials.** Electric conductivity ( $\sigma$ ), Seebeck coefficient ( $S$ ), power factor ( $PF$ ), carrier concentration ( $n$ ), Hall mobility ( $\mu$ ), effective mass ( $m^*$ ), weighted mobility ( $\mu_w = \mu(m^*/m_e)^{3/2}$ ) of some n-type  $\alpha$ -Mg<sub>3</sub>Bi<sub>2</sub>-based single crystals and polycrystalline samples<sup>30,59-66</sup>.

| Materials                                                                                      | $\sigma$<br>(S cm <sup>-1</sup> ) | $S$<br>( $\mu$ V K <sup>-1</sup> ) | $PF$<br>( $\mu$ W cm <sup>-1</sup> K <sup>-2</sup> ) | $n$<br>(10 <sup>19</sup> cm <sup>-3</sup> ) | $\mu$<br>(cm <sup>2</sup> V <sup>-1</sup> s <sup>-1</sup> ) | $m^*/m_e$ | $\mu(m^*/m_e)^{3/2}$<br>(cm <sup>2</sup> V <sup>-1</sup> s <sup>-1</sup> ) | Ref. |
|------------------------------------------------------------------------------------------------|-----------------------------------|------------------------------------|------------------------------------------------------|---------------------------------------------|-------------------------------------------------------------|-----------|----------------------------------------------------------------------------|------|
| n-Mg <sub>3</sub> Bi <sub>2</sub> // <i>ab</i> -plane                                          | 2300                              | -123.3                             | 35                                                   | 13.3                                        | 108                                                         | 1.60      | 218                                                                        | This |
| n-Mg <sub>3</sub> Bi <sub>2</sub> // <i>c</i> -axis                                            | 2907.4                            | -95                                | 26.2                                                 | 13.3                                        | 136.4                                                       | 1.23      | 186.24                                                                     | work |
| Mg <sub>3.2</sub> Bi <sub>1.998</sub> Te <sub>0.002</sub><br>// <i>ab</i> -plane               | 1429                              | -200                               | 55                                                   | 3.7                                         | 232                                                         | 1.3       | 343.88                                                                     | 39   |
| Mg <sub>3.2</sub> Bi <sub>1.998</sub> Te <sub>0.002</sub><br>// <i>c</i> -plane                | 2356                              | -57                                | 7.65                                                 | 3.7                                         | 397                                                         | 0.89      | 333.33                                                                     |      |
| Mg <sub>3.2</sub> Bi <sub>1.998</sub> Te <sub>0.002</sub>                                      | 1234.6                            | -129                               | 20                                                   | 3.25                                        | 200                                                         | 0.53      | 77.17                                                                      | 59   |
| Mg <sub>3</sub> Bi <sub>1.49</sub> Sb <sub>0.5</sub> Te <sub>0.01</sub><br>// <i>ab</i> -plane | 1606.9                            | -150                               | 36.16                                                | 4                                           | 266                                                         | 0.87      | 216.93                                                                     | 60   |
| Mg <sub>3</sub> Bi <sub>1.49</sub> Sb <sub>0.5</sub> Te <sub>0.01</sub><br>// <i>c</i> -axis   | 1141.7                            | -143                               | 26.6                                                 | 4                                           | 189                                                         | 0.83      | 143.47                                                                     |      |
| Y:Mg <sub>3</sub> Bi <sub>1.25</sub> Sb <sub>0.75</sub>                                        | 886.3                             | -214.9                             | 40.9                                                 | 4                                           | 140                                                         | 1.25      | 195.92                                                                     | 61   |
| Te:Mg <sub>3</sub> Sb <sub>2</sub>                                                             | 531.5                             | -204.4                             | 22.2                                                 | 3.27                                        | 236                                                         | 1.04      | 250.62                                                                     | 62   |
| Mg <sub>3.032</sub> Y <sub>0.018</sub> BiSb                                                    | 1282                              | -141                               | 25.5                                                 | 7.1                                         | 120                                                         | 1.4       | 198.78                                                                     | 63   |
| Mg <sub>3</sub> Sb <sub>0.6</sub> Bi <sub>1.4</sub>                                            | 1361.7                            | -142.6                             | 27.69                                                | 5.71                                        | 149                                                         | 1.27      | 212.49                                                                     | 64   |
| Mg <sub>3.15</sub> Sb <sub>0.5</sub> Bi <sub>1.4975</sub> Te <sub>0.0025</sub>                 | 680                               | -224                               | 33.22                                                | 2.02                                        | 210                                                         | 0.83      | 157.83                                                                     | 65   |
| Nb <sub>0.1</sub> /Mg <sub>3</sub> Sb <sub>1.5</sub> Bi <sub>0.49</sub> Te <sub>0.01</sub>     | 760                               | -205                               | 31.64                                                | 3                                           | 158.5                                                       | 0.98      | 154.89                                                                     | 66   |

**Supplementary Table 8.**

**Output performance testing conditions of f-TEG.** Heating element temperature ( $T_{\text{hot}}$ ), circulating water temperature ( $T_{\text{cold}}$ ), and the estimated temperature difference ( $\Delta T$ ) across f-TEG device.

| $T_{\text{hot}}$ (K) | $T_{\text{cold}}$ (K) | $\Delta T$ (K) |
|----------------------|-----------------------|----------------|
| 313                  | 295                   | 1.3            |
| 323                  | 295                   | 2.3            |
| 333                  | 295                   | 3.3            |
| 343                  | 295                   | 4.3            |
| 353                  | 295                   | 5.3            |
| 363                  | 295                   | 6.3            |
| 383                  | 295                   | 7.3            |

## Supplementary References

76. Snyder G. J. & Toberer, E. S. Complex thermoelectric materials. *Nat. Mater.* **7**, 105–114 (2008).
77. Shakouri, A. Recent developments in semiconductor thermoelectric physics and materials. *Annu. Rev. Mater Res.* **41**, 399-431 (2011).
