# Supplementary material for: Helical dislocation-driven plasticity and flexible high-performance thermoelectric generator in α-Mg3Bi2 single crystals
Source: PubMed Central journal article supplement — Nat Commun. 2025 Jan 2;16:128. doi: 10.1038/s41467-024-55689-7 (PMC11695975; doi:10.1038/s41467-024-55689-7), 2025-01-02
Supplement: 41467_2024_55689_MOESM2_ESM.pdf [file 41467_2024_55689_MOESM2_ESM.pdf]

## **Description of Additional Supplementary Files**

**Supplementary Movie 1:** In-situ SEM uniaxial compression test.

**Supplementary Movie 2:** AIMD simulation process along *a*-axis.

**Supplementary Movie 3:** AIMD simulation process along *c*-axis.
